# Supplementary material for: Preparation for fatherhood: A survey of men’s preconception health knowledge and behaviour in England
Source: PLoS One. 2019 Mar 20;14(3):e0213897. doi: 10.1371/journal.pone.0213897 (PMC6426231; doi:10.1371/journal.pone.0213897)
Supplement: S1 File — The file contains the anonymised raw data used in this manuscript. (CSV) [file pone.0213897.s001.csv]

## Sheet: Antenatal Partner_Data File_201
PID	Clinic	Questionnaire	Gender	bLookAnyYN	bSourceBooks	bSourceMags	bSourceLeaflet	bSourceGPHP	bSourceInternet	bSourceFamFriends	bSourceOtherYN	bSourceOtherStr	cbSourceOtherStr	calcNumbAnySource	calcYNbAnySource	bSourceNone	bSourceRelate	WRONGLABELSbSourceRelate	VAR00042	bSeeHPYN	bGivenInfo	WRONGLABELbGivenInfo	bVitsSuppStr	VAR00025	bFolicInfoGP	bFolicInfoHP	bFolicInfoHPstr	cbFolicInfoHPstr	bFolicInfoFamFriend	bFolicInfoOther	bFolicInfoOtherStr	cbFolicInfoOtherStr	VAR00110	VAR00026	bPregVitInfoGP	bPregVitInfoHP	bPregVitInfoHPstr	cbPregVitInfoHPstr	bPregVitInfoFamFriend	bPregVitInfoOther	bPregVitInfoOtherStr	cbPregVitInfoOtherStr	VAR00031	VAR00027	bOrdMultiVInfoGP	bOrdMultiVInfoHP	bOrdMultiVInfoHPstr	cbOrdMultiVInfoHPstr	bOrdMultiVInfoFamFriend
1	1	2	1	1	0	0	0	0	1	1	0	888	999	3	1	0	3	3		0	888	888	N/A		0	0	888	888	1	1	INTERNET	3			0	0	888	888	1	0	888	888			0	0	888	888	0
2	1	2	1	1	1	1	1	0	1	1	0	888	999	6	1	0	3	3		0	888	888	NONE		0	0	888	888	0	0	888	888			0	0	888	888	0	0	888	888			0	0	888	888	0
4	1	2	1	0	0	0	0	0	0	0	0	888	999	0	0	1	888	888		0	4	4	NONE		0	0	888	888	0	0	888	888			0	0	888	888	0	0	888	888			0	0	888	888	0
5	1	2	1	1	0	0	0	0	1	0	0	888	999	2	1	0	3	3		0	888	888	BEROCCA - VITAMIN		0	0	888	888	1	0	888	888			0	0	888	888	0	0	888	888			0	0	888	888	0
8	1	2	1	0	0	0	0	0	0	0	0	888	999	0	0	1	2	2		0	888	888	MULTI VITAMINS		0	0	888	888	1	0	888	888			0	0	888	888	1	0	888	888			0	0	888	888	1
10	1	2	1	0	0	0	1	0	0	1	0	888	999	2	1	0	2	2		0	4	4	MUTLIVITAMIN		1	0	888	888	0	0	888	888			1	0	888	888	0	0	888	888			0	0	888	888	0
16	1	2	1	0	0	0	0	0	0	0	0	888	999	0	0	1	888	888		0	888	888	NONE		0	0	888	888	0	0	888	888			0	0	888	888	0	0	888	888			0	0	888	888	0
17	1	2	1	0	0	0	0	0	0	0	0	888	999	0	0	1	888	888		0	4	4	NONE		0	0	888	888	0	0	888	888			0	0	888	888	0	0	888	888			0	0	888	888	0
19	1	2	1	999	999	999	999	999	999	999	999	999	999	999	999	999	999	999		999	999	999	999		1	0	888	888	0	1	FOUND OUT OURSELVES	1			0	0	888	888	0	1	999	999			0	0	888	888	0
20	1	2	1	0	0	0	0	0	0	0	1	WIFE	10	1	1	0	3	3		0	888	888	999		0	0	888	888	0	0	888	888			0	0	888	888	0	0	888	888			0	0	888	888	0
24	1	2	1	999	999	999	999	999	999	999	999	888	999	999	999	999	999	999		999	999	999	999		0	0	888	888	0	0	888	888			0	0	888	888	0	0	888	888			0	0	888	888	0
27	1	2	1	1	1	0	0	0	1	1	0	888	999	4	1	0	2	2		1	2	2	PREGNACARE CONCEPTION TABLETS. SANTOGEN. FOLIC ACID + VITAMINS		1	0	888	888	0	0	888	888			1	0	888	888	0	0	888	888			0	0	888	888	0
30	1	2	1	0	0	0	0	0	0	1	0	888	999	1	1	0	2	2		0	888	888	POWDER SPORTS NUTRITION (SHAKES). VITAMIN C		0	0	888	888	1	0	888	888			0	0	888	888	0	0	888	888			0	0	888	888	0
38	1	2	1	1	1	1	0	1	1	1	0	888	999	6	1	0	3	3		1	2	2	999		0	0	888	888	1	0	888	888			0	0	888	888	0	0	888	888			0	0	888	888	0
39	1	2	1	1	0	0	0	0	1	1	0	888	999	3	1	0	3	3		0	888	888	WELLMAN SPORTS MULTIVITAMINS		0	0	888	888	0	1	999	999			0	0	888	888	0	1	999	999			0	0	888	888	0
40	1	2	1	0	0	0	0	0	0	0	0	888	999	0	0	1	888	888		0	888	888	NONE		0	0	888	888	0	1	999	999			0	0	888	888	0	0	888	888			0	0	888	888	0
41	1	2	1	1	1	0	0	0	0	0	1	WE HAVE ONE CHILD ALREADY	6	3	1	0	3	3		0	4	4	MULTI VIT		0	0	888	888	0	0	888	888			0	0	888	888	0	0	888	888			0	0	888	888	0
42	1	2	1	1	1	0	0	1	0	0	0	888	999	3	1	0	2	2		0	4	4	MENS MULTIVITAMIN		0	0	888	888	1	0	888	888			0	0	888	888	0	0	888	888			0	0	888	888	0
43	1	2	1	0	0	0	0	0	0	0	0	888	999	0	0	1	888	888		0	4	4	NONE		0	0	888	888	0	0	888	888			0	0	888	888	0	0	888	888			0	0	888	888	0
45	1	2	1	1	1	0	0	0	1	1	0	888	999	4	1	0	3	3		0	888	888	MULTI VITAMINS		0	0	888	888	1	0	888	888			0	0	888	888	1	0	888	888			0	0	888	888	1
46	1	2	1	1	0	1	0	0	1	1	0	888	999	4	1	0	3	3		1	3	3	WELLMAN		0	0	888	888	0	1	SELF	1			0	0	888	888	0	1	SELF	1			0	0	888	888	0
47	1	2	1	0	0	0	0	0	1	0	0	888	999	1	1	0	3	3		0	888	888	999		0	0	888	888	1	0	888	888			0	1	OSTEOPATH	4	0	0	888	888			0	0	888	888	1
49	1	2	1	0	0	0	0	0	0	0	0	888	999	0	0	1	888	888		0	888	888	999		0	0	888	888	0	0	888	888			0	0	888	888	0	0	888	888			0	0	888	888	0
51	1	2	1	0	0	0	0	0	0	0	0	888	999	0	0	1	888	888		0	888	888	NONE		0	0	888	888	0	0	888	888			0	0	888	888	0	0	888	888			0	0	888	888	0
53	1	2	1	1	1	0	0	1	1	1	0	888	999	5	1	0	3	3		0	888	888	DAILY MULTI-VITAMINS		1	0	888	888	0	0	888	888			0	0	888	888	1	1	SELF	1			1	0	888	888	0
54	1	2	1	0	1	0	0	0	0	0	0	888	999	1	1	0	3	3		0	4	4	NONE		0	0	888	888	0	0	888	888			0	0	888	888	0	0	888	888			0	0	888	888	0
55	1	2	1	0	0	0	0	0	0	0	0	888	999	0	0	1	888	888		0	4	4	NONE		0	0	888	888	0	0	888	888			0	0	888	888	0	0	888	888			0	0	888	888	0
56	1	2	1	1	0	0	0	0	1	1	0	888	999	3	1	0	3	3		0	888	888	NONE		0	0	888	888	0	1	MY PARTNER	9			0	0	888	888	0	1	MY PARTNER	9			0	0	888	888	0
57	1	2	1	0	1	0	0	0	1	0	0	888	999	2	1	0	2	2		0	888	888	BEROCA		0	0	888	888	0	0	888	888			0	0	888	888	0	0	888	888			0	0	888	888	0
58	1	2	1	1	1	0	0	0	1	0	0	888	999	3	1	0	2	2		0	888	888	NONE		0	0	888	888	0	1	READING PREGNANCY BOOK	4			0	0	888	888	0	0	888	888			0	0	888	888	0
59	1	2	1	1	0	0	0	0	1	0	0	888	999	2	1	0	3	3		0	888	888	N/A		0	0	888	888	0	1	ALREADY KNEW	8			0	0	888	888	0	0	888	888			0	0	888	888	0
65	1	2	1	0	0	0	0	0	0	0	0	888	999	0	0	1	888	888		0	888	888	NONE		0	0	888	888	0	0	888	888			0	0	888	888	1	0	888	888			0	0	888	888	0
66	1	2	1	0	0	0	0	0	0	1	0	888	999	1	1	0	3	3		0	888	888	NONE		0	0	888	888	0	0	888	888			0	0	888	888	0	0	888	888			0	0	888	888	0
67	1	2	1	0	0	0	0	0	0	0	0	888	999	0	0	1	888	888		0	888	888	PREGNACARE		0	0	888	888	0	0	888	888			0	0	888	888	0	0	888	888			0	0	888	888	0
68	1	2	1	1	1	0	0	1	1	0	0	888	999	4	1	0	3	3		0	888	888	MULTI-VITAMIN SUPPLEMENT		0	0	888	888	0	0	888	888			0	0	888	888	0	0	888	888			0	0	888	888	0
69	1	2	1	1	999	999	999	999	999	999	999	888	999	999	999	999	999	999		999	999	999	999		0	0	888	888	0	0	888	888			0	0	888	888	0	0	888	888			0	0	888	888	0
73	1	2	1	1	0	0	0	0	1	0	0	888	999	2	1	0	3	3		1	3	3	999		0	0	888	888	0	0	888	888			0	0	888	888	0	0	888	888			0	0	888	888	0
75	1	2	1	0	0	0	0	0	0	0	0	888	999	0	0	1	888	888		0	4	4	OCCASIONAL MULTIVITAMINS		0	0	888	888	0	0	888	888			0	0	888	888	0	0	888	888			0	0	888	888	0
76	1	2	1	1	0	0	1	0	1	0	0	888	999	3	1	0	3	3		0	888	888	999		0	0	888	888	0	0	888	888			0	0	888	888	0	0	888	888			0	0	888	888	0
77	1	2	1	0	999	999	999	999	999	999	999	888	999	999	999	999	999	999		0	888	888	999		0	0	888	888	0	0	888	888			0	0	888	888	0	0	888	888			0	0	888	888	0
79	1	2	1	0	0	0	0	0	0	0	0	888	999	0	0	1	888	888		0	888	888	NONE		0	0	888	888	0	0	888	888			0	0	888	888	0	0	888	888			0	0	888	888	0
81	1	2	1	1	1	1	0	0	0	0	0	888	999	3	1	0	2	2		0	888	888	999		0	0	888	888	1	0	888	888			0	0	888	888	0	0	888	888			0	0	888	888	0
83	1	2	1	1	0	0	0	1	1	0	0	888	999	3	1	0	2	2		1	2	2	NONE		0	0	888	888	1	0	888	888			0	0	888	888	0	0	888	888			0	0	888	888	0
84	1	2	1	0	0	0	0	0	0	0	0	888	999	0	0	1	888	888		0	888	888	NONE		0	0	888	888	0	0	888	888			0	0	888	888	0	0	888	888			0	0	888	888	0
85	1	2	1	1	0	1	0	0	1	0	0	888	999	3	1	0	1	1		1	3	3	ZINC. VITAMIN D9 MAGNESIEM9 MULTI VITAMINS		0	0	888	888	0	0	888	888			0	0	888	888	0	0	888	888			0	0	888	888	0
90	1	2	1	1	0	1	0	1	1	0	0	888	999	4	1	0	3	3		1	3	3	MALE PREGNACARE		0	0	888	888	0	0	888	888			0	0	888	888	0	0	888	888			0	0	888	888	0
91	1	2	1	1	0	0	0	1	0	1	0	888	999	3	1	0	2	2		1	2	2	NONE		1	0	888	888	1	0	888	888			0	0	888	888	0	0	888	888			0	0	888	888	0
92	1	2	1	0	0	1	0	1	0	0	0	888	999	2	1	0	2	2		1	2	2	PINEBARK EXTRACT		1	0	888	888	1	0	888	888			0	0	888	888	0	0	888	888			0	0	888	888	0
95	1	2	1	1	0	0	0	0	1	0	0	888	999	2	1	0	3	3		0	4	4	VITAMINS		0	0	888	888	0	0	888	888			0	0	888	888	0	1	999	999			0	0	888	888	0
96	1	2	1	0	0	0	0	0	0	0	0	888	999	0	0	1	888	888		1	3	3	NONE		0	0	888	888	0	0	888	888			0	0	888	888	0	0	888	888			0	0	888	888	0
97	1	2	1	1	0	0	0	0	0	1	0	888	999	2	1	0	2	2		0	888	888	999		0	0	888	888	1	0	888	888			0	0	888	888	0	0	888	888			0	0	888	888	0
98	1	2	1	0	0	0	0	0	0	0	0	888	999	0	0	1	888	888		0	888	888	NONE		0	0	888	888	0	0	888	888			0	0	888	888	0	0	888	888			0	0	888	888	0
99	1	2	1	0	0	0	0	0	0	0	0	888	999	0	0	1	888	888		0	4	4	NONE		0	0	888	888	0	0	888	888			0	0	888	888	0	0	888	888			0	0	888	888	0
100	1	2	1	0	0	0	0	0	0	0	0	888	999	0	0	1	3	3		0	4	4	999		0	0	888	888	0	0	888	888			0	0	888	888	0	0	888	888			0	0	888	888	0
101	1	2	1	1	0	0	0	0	1	1	0	888	999	3	1	0	2	2		0	888	888	999		0	0	888	888	1	1	AT BOOTS	6			0	0	888	888	1	1	AT BOOTS	6			0	0	888	888	0
103	1	2	1	0	0	0	0	0	0	0	0	888	999	0	0	1	888	888		0	4	4	999		0	0	888	888	0	0	888	888			0	0	888	888	0	0	888	888			0	0	888	888	0
104	1	2	1	0	0	0	0	0	0	0	0	888	999	0	0	1	888	888		0	888	888	NONE		0	0	888	888	0	0	888	888			0	0	888	888	0	0	888	888			0	0	888	888	0
105	1	2	1	1	0	0	0	0	1	0	0	888	999	2	1	0	3	3		0	888	888	MULTI VITAMINS		1	0	888	888	0	0	888	888			0	0	888	888	0	0	888	888			0	0	888	888	0
106	1	2	1	0	0	0	0	1	0	0	1	TELEVISION NEWS	8	2	1	0	2	2		0	888	888	BEROCCA & A-Z MULTIVITAMIN INFREQUENTLY. 1-2 EVERY 2 WEEKS.		0	0	888	888	0	0	888	888			0	0	888	888	0	0	888	888			0	0	888	888	0
107	1	2	1	0	0	0	0	0	0	0	0	JUST ASK HER TO GIVE ME ANOTHER CHILD	888	0	0	0	999	999		0	4	4	999		0	0	888	888	0	0	888	888			0	0	888	888	0	0	888	888			0	0	888	888	0
110	1	2	1	0	0	0	0	0	0	1	0	888	999	1	1	0	3	3		0	2	2	NONE		0	0	888	888	0	0	888	888			0	0	888	888	0	0	888	888			0	0	888	888	0
111	1	2	1	1	1	0	0	0	0	0	1	WORKED IN PREBIRTH / MATERNAL HEALTH	3	3	1	0	2	2		0	4	4	PROTEIN SUPPLEMENTS. CREATINE		0	0	888	888	1	0	888	888			0	0	888	888	0	0	888	888			0	0	888	888	0
112	1	2	1	999	999	999	999	999	999	999	999	888	999	999	999	999	999	999		999	999	999	999		0	0	888	888	0	0	888	888			0	0	888	888	0	0	888	888			0	0	888	888	0
113	1	2	1	1	0	0	0	0	1	0	0	888	999	2	1	0	3	3		0	888	888	999		0	0	888	888	0	0	888	888			0	0	888	888	0	0	888	888			0	0	888	888	0
114	1	2	1	0	0	0	0	0	0	0	0	888	999	0	0	1	888	888		0	4	4	C, MAGNESIUM		0	0	888	888	0	0	888	888			0	0	888	888	0	0	888	888			0	0	888	888	0
115	1	2	1	1	0	0	0	1	1	1	0	888	999	4	1	0	3	3		1	3	3	ZINC TABLETS & CELENIUM		0	0	888	888	0	0	888	888			0	0	888	888	0	0	888	888			0	0	888	888	0
116	1	2	1	1	0	0	0	1	1	1	1	MEDICAL SCHOOL	3	5	1	0	3	3		0	888	888	NIL		0	0	888	888	1	1	SELF	1			0	0	888	888	1	1	SELF	1			0	0	888	888	0
117	1	2	1	0	0	0	0	0	0	1	0	888	999	1	1	0	3	3		0	888	888	NONE		0	0	888	888	0	0	888	888			0	0	888	888	0	0	888	888			0	0	888	888	0
118	1	2	1	1	0	0	0	0	1	0	0	888	999	2	1	0	3	3		0	4	4	MULTI VITAMIN / SALRENIUM / COD LIVER OIL		0	0	888	888	0	0	888	888			0	0	888	888	0	0	888	888			0	0	888	888	0
121	1	2	1	1	0	0	0	0	1	1	0	888	999	3	1	0	3	3		0	888	888	PREGNACARE FOR MEN		0	0	888	888	1	0	888	888			0	0	888	888	1	0	888	888			0	0	888	888	0
122	1	2	1	1	0	0	0	0	1	1	0	888	999	3	1	0	3	3		0	3	3	WELLMAN (VITABIOTICS). MULTI VITAMINS		0	0	888	888	1	0	888	888			0	0	888	888	1	0	888	888			0	0	888	888	1
123	1	2	1	1	0	0	0	0	1	1	0	888	999	3	1	0	3	3		0	888	888	SOME BODY BUILDING SUPPLEMENTS		0	0	888	888	1	0	888	888			0	0	888	888	1	0	888	888			0	0	888	888	0
124	1	2	1	1	1	0	0	0	0	1	0	888	999	3	1	0	3	3		0	888	888	MULTIVITAMIN DAILY		0	0	888	888	1	0	888	888			0	0	888	888	0	0	888	888			0	0	888	888	0
125	1	2	1	1	1	0	0	0	1	0	0	888	999	3	1	0	3	3		0	888	888	MULTI VITAMIN		0	0	888	888	0	1	999	999			0	0	888	888	0	1	999	999			0	0	888	888	0
126	1	2	1	0	0	0	1	0	0	1	0	888	999	2	1	0	3	3		0	4	4	NONE		0	0	888	888	0	0	888	888			0	0	888	888	0	0	888	888			0	0	888	888	0
129	1	2	1	0	0	0	0	0	0	1	0	888	999	1	1	0	3	3		0	888	888	N/A		0	0	888	888	0	0	888	888			0	0	888	888	0	0	888	888			0	0	888	888	0
130	1	2	1	0	0	0	0	0	0	0	0	888	999	0	0	1	888	888		0	888	888	NONE		0	0	888	888	0	0	888	888			0	0	888	888	0	0	888	888			0	0	888	888	0
131	1	2	1	1	0	0	0	0	1	0	0	888	999	2	1	0	3	3		0	888	888	NONE		0	0	888	888	0	1	NHS WEBSITE	3			0	0	888	888	0	1	WEBSITES	3			0	0	888	888	0
133	1	2	1	0	0	0	0	0	0	0	0	888	999	0	0	1	888	888		0	4	4	999		0	0	888	888	0	0	888	888			0	0	888	888	0	0	888	888			0	0	888	888	0
135	1	2	1	1	0	0	0	0	1	1	0	888	999	3	1	0	3	3		0	888	888	NO SUPPLEMENTS, BUT A DIET THAT INCLUDED THE SAME NUTRITIONS AS FOUND IN MALE PRE-PREGNANCY SUPPLEMENTS		0	0	888	888	1	0	888	888			0	0	888	888	0	0	888	888			0	0	888	888	0
140	1	2	1	0	0	0	0	0	0	0	0	888	999	0	0	1	888	888		0	4	4	999		0	0	888	888	0	0	888	888			0	0	888	888	0	0	888	888			0	0	888	888	0
141	1	2	1	0	0	0	0	0	0	0	0	888	999	0	0	1	888	888		0	888	888	BEROCCA (SOLUBLE VITAMINS)		0	0	888	888	0	0	888	888			0	0	888	888	0	0	888	888			0	0	888	888	0
144	1	2	1	1	1	1	0	0	1	1	0	888	999	5	1	0	3	3		0	888	888	OMEGA & MULTIVITAMINS		0	0	888	888	0	0	888	888			0	0	888	888	0	0	888	888			0	0	888	888	0
146	1	2	1	0	0	0	0	0	0	0	0	888	999	0	0	1	888	888		0	888	888	NA		0	0	888	888	0	0	888	888			0	0	888	888	0	0	888	888			0	0	888	888	0
149	1	2	1	1	1	1	1	0	1	1	0	888	999	6	1	0	2	2		0	888	888	N/A		1	0	888	888	1	0	888	888			0	0	888	888	0	0	888	888			0	0	888	888	0
151	1	2	1	1	1	0	0	0	1	0	0	888	999	3	1	0	2	2		0	888	888	B COMPLEX. VITAMIN C. VITAMIN D		0	0	888	888	0	0	888	888			0	0	888	888	0	0	888	888			0	0	888	888	0
154	1	2	1	0	1	0	0	0	1	1	0	888	999	3	1	0	2	2		0	888	888	NONE		0	0	888	888	1	1	UNIVERSITY, INTERNET	7			0	0	888	888	1	1	INTERNET	3			0	0	888	888	1
155	1	2	1	0	0	0	0	0	0	0	0	888	999	0	0	1	888	888		0	888	888	999		0	0	888	888	0	0	888	888			0	0	888	888	0	0	888	888			0	0	888	888	0
157	1	2	1	1	0	0	1	1	1	0	0	888	999	4	1	0	2	2		1	2	2	999		1	0	888	888	0	0	888	888			0	0	888	888	0	0	888	888			0	0	888	888	0
158	1	2	1	0	0	0	0	0	0	0	0	888	999	0	0	1	888	888		0	888	888	NONE		0	0	888	888	0	0	888	888			0	0	888	888	0	0	888	888			0	0	888	888	0
159	1	2	1	0	0	0	0	0	0	0	0	888	999	0	0	1	888	888		0	888	888	NONE		0	0	888	888	0	0	888	888			0	0	888	888	0	1	SELF	1			0	0	888	888	0
161	1	2	1	1	1	1	0	0	1	0	0	888	999	4	1	0	2	2		1	2	2	ZINC TABLETS		1	0	888	888	0	0	888	888			0	0	888	888	0	0	888	888			0	0	888	888	0
162	1	2	1	1	0	0	0	0	1	1	0	888	999	3	1	0	3	3		0	888	888	N/A		0	0	888	888	1	1	INTERNET	3			0	0	888	888	1	1	INTERNET	3			0	0	888	888	0
166	1	2	1	0	0	0	0	0	0	0	0	888	999	0	0	1	888	888		0	888	888	N/A		0	0	888	888	0	0	888	888			0	0	888	888	0	0	888	888			0	0	888	888	0
168	1	2	1	0	0	0	0	0	0	0	0	888	999	0	0	1	888	888		0	4	4	999		0	0	888	888	0	0	888	888			0	0	888	888	0	0	888	888			0	0	888	888	0
169	1	2	1	1	0	0	0	1	1	0	0	888	999	3	1	0	2	2		0	888	888	NONE		0	0	888	888	0	0	888	888			0	0	888	888	0	0	888	888			0	0	888	888	0
171	1	2	1	0	0	0	0	0	0	0	0	888	999	0	0	1	888	888		0	888	888	VITAMIN C, IRON		0	0	888	888	0	0	888	888			0	0	888	888	0	0	888	888			0	0	888	888	0
172	1	2	1	1	1	1	0	0	1	1	0	888	999	5	1	0	3	3		0	888	888	NONE		0	0	888	888	0	0	888	888			0	0	888	888	0	0	888	888			0	0	888	888	0
174	1	2	1	1	0	0	0	1	1	0	0	888	999	3	1	0	3	3		1	3	3	FOLIC ACID		1	0	888	888	0	0	888	888			0	0	888	888	0	0	888	888			0	0	888	888	0
176	1	2	1	1	1	0	0	0	0	0	0	888	999	2	1	0	3	3		0	888	888	*ILLEGIBLE*		0	0	888	888	0	0	888	888			0	0	888	888	0	0	888	888			0	0	888	888	0
177	1	2	1	0	0	0	0	0	1	1	0	888	999	2	1	0	2	2		0	888	888	NOTHING		0	0	888	888	0	1	TV ETC	5			0	0	888	888	0	1	999	999			0	0	888	888	0
179	1	2	1	0	1	1	1	1	1	1	0	888	999	6	1	0	2	2		0	4	4	999		1	0	888	888	0	0	888	888			1	0	888	888	0	0	888	888			0	0	888	888	0
183	1	2	1	1	0	0	0	0	1	0	0	888	999	2	1	0	2	2		0	4	4	999		0	0	888	888	0	0	888	888			0	0	888	888	0	0	888	888			0	0	888	888	0
185	1	2	1	1	1	0	1	0	1	1	0	888	999	5	1	0	3	3		1	3	3	PRENATAL VITAMINS (OFF THE SHELF)		0	0	888	888	0	0	888	888			0	0	888	888	0	0	888	888			0	0	888	888	0
186	1	2	1	0	0	0	0	0	0	0	0	888	999	0	0	1	888	888		0	888	888	NONE		0	0	888	888	0	0	888	888			0	0	888	888	0	0	888	888			0	0	888	888	0
189	1	2	1	0	0	0	0	0	0	1	0	888	999	1	1	0	2	2		0	888	888	N/A		0	0	888	888	0	0	888	888			0	0	888	888	0	0	888	888			0	0	888	888	0
193	1	2	1	0	0	0	0	0	0	0	0	888	999	0	0	1	888	888		0	888	888	MULTIVITAMIN SUPPLEMENTS + OMEGA 3 / 6		0	0	888	888	0	0	888	888			0	0	888	888	0	0	888	888			0	0	888	888	0
194	1	2	1	0	0	0	0	0	0	0	0	888	999	0	0	1	888	888		0	888	888	NONE		0	0	888	888	0	0	888	888			0	0	888	888	0	0	888	888			0	0	888	888	0
195	1	2	1	1	0	0	0	0	0	1	0	888	999	2	1	0	2	2		0	4	4	SANATOGEN		1	0	888	888	0	0	888	888			0	0	888	888	0	0	888	888			0	0	888	888	0
197	1	2	1	0	0	0	0	0	0	1	0	888	999	1	1	0	2	2		1	2	2	999		0	0	888	888	0	0	888	888			0	0	888	888	0	0	888	888			0	0	888	888	0
198	1	2	1	1	0	0	0	0	1	0	0	888	999	2	1	0	2	2		1	2	2	999		0	0	888	888	0	0	888	888			0	0	888	888	0	0	888	888			0	0	888	888	0
201	1	2	1	1	1	0	0	0	1	0	1	999	999	4	1	0	3	3		0	888	888	PREGNACARE CONCEPTION MAN (OR SOME SUCH). NOT VERY REGULARLY THOUGH		0	0	888	888	1	0	888	888			0	0	888	888	1	0	888	888			0	0	888	888	0
203	1	2	1	0	0	0	0	0	1	1	0	888	999	2	1	0	3	3		0	888	888	NONE		0	0	888	888	0	0	888	888			0	0	888	888	0	0	888	888			0	0	888	888	0
204	1	2	1	1	1	1	1	0	1	1	0	888	999	6	1	0	3	3		0	4	4	NIL		0	0	888	888	0	1	SELF	1			0	0	888	888	0	1	SELF	1			0	0	888	888	0
205	1	2	1	0	0	0	0	0	0	0	0	888	999	0	0	1	888	888		0	888	888	999		0	0	888	888	0	0	888	888			0	0	888	888	0	0	888	888			0	0	888	888	0
206	1	2	1	0	0	0	0	0	0	1	0	888	999	1	1	0	3	3		0	4	4	NONE		0	0	888	888	0	0	888	888			0	0	888	888	0	0	888	888			0	0	888	888	0
207	1	2	1	1	1	0	0	1	0	0	1	DEGREE - PHARMACEUTICAL MANAGEMENT MODULE - REPRODUCTIVE BIOLOGY (HUMAN)	3	4	1	0	3	3		0	888	888	999		0	0	888	888	1	0	888	888			0	0	888	888	0	1	ADVERT ON TUBE	5			0	0	888	888	0
208	1	2	1	1	0	0	0	0	1	1	0	888	999	3	1	0	2	2		1	3	3	999		1	0	888	888	1	0	888	888			1	0	888	888	1	0	888	888			0	0	888	888	0
209	1	2	1	1	0	0	0	0	1	1	0	888	999	3	1	0	3	3		0	888	888	999		0	0	888	888	0	0	888	888			0	0	888	888	0	0	888	888			0	0	888	888	0
210	1	2	1	0	0	0	0	0	0	0	0	888	999	0	0	1	888	888		0	4	4	VITAMIN C TABLETS		0	0	888	888	0	0	888	888			0	0	888	888	0	0	888	888			0	0	888	888	0
211	1	2	1	0	0	0	0	0	0	1	0	888	999	1	1	0	3	3		0	4	4	999		0	0	888	888	0	0	888	888			0	0	888	888	0	0	888	888			0	0	888	888	0
212	1	2	1	1	0	0	1	1	1	1	0	888	999	5	1	0	2	2		1	3	3	N/A		0	0	888	888	1	0	888	888			0	0	888	888	1	0	888	888			0	0	888	888	1
215	1	2	1	0	0	0	0	0	0	0	0	888	999	0	0	1	888	888		0	888	888	NONE		0	0	888	888	0	0	888	888			0	0	888	888	0	0	888	888			0	0	888	888	0
217	1	2	1	0	0	0	0	0	1	1	0	888	999	2	1	0	2	2		0	4	4	999		1	0	888	888	0	0	888	888			0	0	888	888	0	0	888	888			0	0	888	888	0
218	1	2	1	0	0	0	0	0	0	0	0	888	999	0	0	1	888	888		1	4	4	BRAZIL NUTS		0	0	888	888	0	0	888	888			0	0	888	888	0	0	888	888			0	0	888	888	0
219	1	2	1	0	0	0	0	0	0	0	0	888	999	0	0	1	888	888		0	888	888	999		0	0	888	888	1	0	888	888			0	0	888	888	0	0	888	888			0	0	888	888	0
221	1	2	1	1	0	0	0	0	1	0	0	888	999	2	1	0	3	3		0	888	888	NONE		0	0	888	888	0	0	888	888			0	0	888	888	0	0	888	888			0	0	888	888	0
223	1	2	1	0	0	0	0	1	0	1	0	888	999	2	1	0	2	2		1	4	4	NONE		0	0	888	888	0	0	888	888			0	0	888	888	0	0	888	888			0	0	888	888	0
225	1	2	1	0	0	0	0	0	0	0	0	888	999	0	0	1	888	888		0	4	4	OLIVE LEAF EXTRACT		0	0	888	888	0	0	888	888			0	0	888	888	0	0	888	888			0	0	888	888	0
226	1	2	1	1	0	0	0	0	1	1	0	888	999	3	1	0	3	3		0	888	888	VITAMIN C BUT TAKE THIS GENERALLY		0	0	888	888	0	0	888	888			0	0	888	888	0	0	888	888			0	0	888	888	0
227	1	2	1	0	0	0	0	0	0	0	0	888	999	0	0	1	888	888		0	4	4	NONE		0	0	888	888	0	0	888	888			0	0	888	888	0	0	888	888			0	0	888	888	0
228	1	2	1	0	0	0	0	0	0	0	0	888	999	0	0	1	888	888		0	888	888	NONE		0	0	888	888	0	0	888	888			0	0	888	888	0	0	888	888			0	0	888	888	0
230	1	2	1	0	0	0	0	0	0	0	0	888	999	0	0	1	888	888		0	4	4	NONE		0	0	888	888	0	0	888	888			0	0	888	888	0	0	888	888			0	0	888	888	0
231	1	2	1	1	0	0	0	0	1	1	1	PARTNER	10	4	1	0	3	3		0	888	888	VITAMIN C		0	0	888	888	1	0	888	888			0	0	888	888	0	0	888	888			0	0	888	888	0
232	1	2	1	1	1	0	0	0	0	0	0	888	999	2	1	0	3	3		1	2	2	999		0	0	888	888	0	0	888	888			0	0	888	888	1	0	888	888			0	0	888	888	0
236	1	2	1	1	1	0	1	0	1	0	0	888	999	4	1	0	2	2		1	2	2	999		0	0	888	888	0	0	888	888			0	0	888	888	0	0	888	888			0	0	888	888	0
237	1	2	1	0	0	0	0	0	0	0	0	888	999	0	0	1	888	888		0	888	888	PROTEIN POWDER. GLUTAMINE CAPSULES. CREATINE POWDER. OMEGA 3 TABS. B12 VITAMIN TABS		0	0	888	888	0	0	888	888			0	0	888	888	0	0	888	888			0	0	888	888	0
238	1	2	1	1	1	0	0	1	1	1	0	888	999	5	1	0	3	3		1	3	3	MULTI-VITAMIN		0	0	888	888	0	0	888	888			0	0	888	888	0	0	888	888			0	0	888	888	0
239	1	2	1	1	0	0	0	0	1	1	0	888	999	3	1	0	3	3		1	3	3	NONE		0	0	888	888	0	0	888	888			0	0	888	888	0	0	888	888			0	0	888	888	0
240	1	2	1	0	0	0	0	0	1	0	0	888	999	1	1	0	2	2		0	888	888	NONE		0	0	888	888	0	0	888	888			0	0	888	888	0	0	888	888			0	0	888	888	0
242	1	2	1	0	1	1	1	0	1	0	1	I USED TO WORK AT A PARENTING CHARITY	3	5	1	0	3	3		0	888	888	ZINC, IRON, VIT C, VIT B COMPLEX, CALCIUM, MAGNESIUM		0	0	888	888	0	1	INTERNET	3			0	0	888	888	0	1	INTERNET	3			0	0	888	888	0
244	1	2	1	1	0	1	0	0	0	0	0	888	999	2	1	0	3	3		1	3	3	999		1	0	888	888	0	0	888	888			1	0	888	888	0	0	888	888			1	0	888	888	0
245	1	2	1	1	1	0	0	0	1	0	0	888	999	3	1	0	3	3		0	888	888	DAILY MULTIVITAMIN (BEROCCA)		0	0	888	888	0	1	999	999			0	0	888	888	0	0	888	888			0	0	888	888	0
246	1	2	1	0	0	0	0	1	1	0	0	888	999	2	1	0	999	999		0	888	888	NONE		0	0	888	888	0	1	GENERAL KNOWLEDGE	8			0	0	888	888	0	0	888	888			0	0	888	888	0
247	1	2	1	1	1	0	0	0	1	1	0	888	999	4	1	0	2	2		1	3	3	MULTI VITAMIN, ACETYL 1 - CARNITINE, CREATINE, WHEY PROTEIN, OMEGA 3, 6, 9 OILS		0	0	888	888	0	1	SELF	1			0	0	888	888	0	1	SELF	1			0	0	888	888	0
248	1	2	1	1	1	0	1	1	1	1	0	888	999	6	1	0	2	2		0	888	888	999		1	0	888	888	0	0	888	888			1	0	888	888	0	0	888	888			1	0	888	888	0
249	1	2	1	0	0	0	0	0	0	1	0	888	999	1	1	0	3	3		0	888	888	WEIGHT MANAGEMENT SUPPLEMENTS		0	0	888	888	1	0	888	888			0	0	888	888	0	0	888	888			0	0	888	888	1
252	1	2	1	1	1	1	1	1	1	1	0	888	999	7	1	0	3	3		1	3	3	DEEP SEA FISH OILS + OMEGA 3. FERTILITY SUPPLEMENTS. VITAMIN C		1	1	VIVERA CLINIC	9	0	0	MARILYN GLANVILLE	888			1	1	VIVERA CLINIC	9	0	0	MARILYN GLANVILLE	888			0	0	888	888	0
253	1	2	1	1	0	0	0	0	1	1	0	888	999	3	1	0	2	2		0	888	888	999		0	0	888	888	1	1	INTERNET	3			0	0	888	888	0	0	888	888			0	0	888	888	0
254	1	2	1	0	0	0	0	0	0	0	1	999	999	1	1	0	3	3		1	3	3	FOLIC ACID & IRON		1	0	888	888	0	0	888	888			0	0	888	888	0	0	888	888			0	0	888	888	0
255	1	2	1	1	0	0	0	0	0	0	1	WIFE	10	2	1	0	2	2		0	888	888	999		0	0	888	888	1	0	888	888			0	0	888	888	0	1	GENERAL KNOWLEDGE	8			0	0	888	888	0
258	1	2	1	0	0	0	0	0	0	0	0	888	999	0	0	1	888	888		0	4	4	NONE		0	0	888	888	0	0	888	888			0	0	888	888	0	0	888	888			0	0	888	888	0
260	1	2	1	1	0	0	1	1	1	1	0	888	999	5	1	0	3	3		0	888	888	WELLMAN VITAMINS FOR MEN		0	0	888	888	0	0	888	888			0	0	888	888	0	1	SELF	1			0	0	888	888	0
262	1	2	1	0	0	0	0	0	0	0	0	888	999	0	0	1	888	888		0	2	2	999		0	0	888	888	0	0	888	888			0	0	888	888	0	0	888	888			0	0	888	888	0
264	1	2	1	0	0	0	0	0	0	1	0	888	999	1	1	0	3	3		0	888	888	NONE		1	0	888	888	1	0	888	888			0	0	888	888	0	0	888	888			0	0	888	888	0
266	1	2	1	1	0	0	0	0	1	0	0	888	999	2	1	0	3	3		1	3	3	999		0	0	888	888	1	0	888	888			0	0	888	888	0	0	888	888			0	0	888	888	0
267	1	2	1	0	1	1	0	0	1	0	0	888	999	3	1	0	3	3		0	888	888	NONE		0	0	888	888	0	0	888	888			0	0	888	888	0	0	888	888			0	0	888	888	0
271	1	2	1	1	0	0	0	0	1	1	0	888	999	3	1	0	2	2		0	888	888	NA		0	0	888	888	1	0	888	888			0	0	888	888	1	0	888	888			0	0	888	888	1
272	1	2	1	1	1	1	0	0	0	1	0	888	999	4	1	0	3	3		0	888	888	999		0	0	888	888	0	0	888	888			0	0	888	888	0	0	888	888			0	0	888	888	0
273	1	2	1	1	0	0	0	0	1	0	0	888	999	2	1	0	3	3		0	4	4	MULTI VITAMINS		0	0	888	888	0	0	888	888			0	0	888	888	0	0	888	888			0	0	888	888	0
274	1	2	1	0	0	0	0	0	0	0	0	888	999	0	0	1	888	888		0	4	4	999		0	0	888	888	0	0	888	888			0	0	888	888	0	0	888	888			0	0	888	888	0
276	1	2	1	0	0	0	0	0	0	0	0	888	999	0	0	1	2	2		0	888	888	999		0	0	888	888	0	0	888	888			1	0	888	888	0	0	888	888			0	0	888	888	0
277	1	2	1	0	1	0	0	0	0	0	0	888	999	1	1	0	3	3		1	3	3	CAN'T REMEMBER NAME		1	0	888	888	1	0	888	888			1	0	888	888	1	0	888	888			0	0	888	888	0
278	1	2	1	0	0	0	0	0	0	0	0	888	999	0	0	1	888	888		0	4	4	999		0	0	888	888	0	0	888	888			0	0	888	888	0	0	888	888			0	0	888	888	0
279	1	2	1	1	0	0	0	1	1	0	0	888	999	3	1	0	3	3		1	3	3	ONLY VITAMINS AND ZINC TABLETS, DONE SO IN AN ALD-LOC MANNER.		0	0	888	888	0	1	MY WIFE KNEW	9			0	0	888	888	0	1	MY WIFE KNEW	9			0	0	888	888	0
281	1	2	1	1	0	0	0	1	1	0	0	888	999	3	1	0	3	3		1	3	3	NONE. STARTED TAKING PREGNACARE FOR MEN WHILE TRYING.		0	0	888	888	1	0	888	888			0	0	888	888	0	1	ADVERTISING	5			0	0	888	888	0
283	1	2	1	0	0	0	0	0	0	0	0	888	999	0	0	1	888	888		0	4	4	999		0	0	888	888	0	0	888	888			0	0	888	888	0	0	888	888			0	0	888	888	0
284	1	2	1	1	1	1	0	1	1	1	0	888	999	6	1	0	3	3		0	2	2	PREGNACARE - FOR PRECONCEPTION		0	0	888	888	0	0	888	888			0	0	888	888	0	0	888	888			0	0	888	888	1
285	1	2	1	1	0	0	0	0	1	0	0	888	999	2	1	0	3	3		0	888	888	NONE		0	0	888	888	0	0	888	888			0	0	888	888	0	0	888	888			0	0	888	888	0
286	1	2	1	1	1	1	0	0	1	0	0	888	999	4	1	0	2	2		1	2	2	NONE		0	0	888	888	0	0	888	888			0	0	888	888	0	0	888	888			0	0	888	888	0
287	1	2	1	1	0	0	0	1	1	1	0	888	999	4	1	0	3	3		1	2	2	NONE		0	0	888	888	0	0	888	888			0	0	888	888	0	0	888	888			0	0	888	888	0
288	1	2	1	0	0	0	0	0	0	0	0	888	999	0	0	1	888	888		0	4	4	NIL		0	0	888	888	0	1	AWARE DUE TO MY PROFESSION (DOCTOR)	1			0	0	888	888	0	0	888	888			0	0	888	888	0
289	1	2	1	0	0	0	0	0	0	0	0	888	999	0	0	1	888	888		0	888	888	PROTEIN BODY BUILDING SUPPLEMENT. MULTI VITAMIN 1-A-DAY TABLET		0	0	888	888	0	0	888	888			0	0	888	888	0	0	888	888			0	0	888	888	0
294	1	2	1	0	999	999	999	999	999	999	999	888	999	999	999	999	999	999		0	888	888	999		0	0	888	888	1	0	888	888			0	0	888	888	0	0	888	888			0	0	888	888	0
295	1	2	1	1	0	0	0	0	1	0	0	888	999	2	1	0	2	2		1	2	2	VITAMIN C, D, E + MULTIVITAMIN SUPPLEMENT		1	0	888	888	0	0	888	888			1	0	888	888	0	0	888	888			1	0	888	888	0
296	1	2	1	1	0	0	0	0	1	1	0	888	999	3	1	0	3	3		0	4	4	NONE		0	0	888	888	0	0	888	888			0	0	888	888	0	0	888	888			0	0	888	888	0
297	1	2	1	0	0	0	0	0	0	0	0	888	999	0	0	1	888	888		0	4	4	MULTI VITAMINS, WHEY PROTEIN, CLA, ZMA		1	0	888	888	0	0	888	888			0	0	888	888	0	1	999	999			0	0	888	888	0
298	1	2	1	1	0	0	1	0	1	0	0	888	999	3	1	0	3	3		0	888	888	NONE		0	0	888	888	0	1	PHARMACY	6			0	0	888	888	0	1	PHARMACY	6			0	0	888	888	0
299	1	2	1	0	0	0	0	0	0	0	0	888	999	0	0	1	888	888		0	4	4	999		0	0	888	888	0	0	888	888			0	0	888	888	0	0	888	888			0	0	888	888	0
305	1	2	1	1	1	0	0	0	0	0	0	888	999	2	1	0	3	3		0	4	4	NONE		0	0	888	888	1	0	888	888			0	0	888	888	1	0	888	888			0	0	888	888	1
306	1	2	1	1	0	0	0	0	1	1	0	888	999	3	1	0	3	3		0	4	4	NONE		0	0	888	888	0	0	888	888			0	0	888	888	0	0	888	888			0	0	888	888	0
307	1	2	1	1	1	0	0	0	0	0	0	888	999	2	1	0	2	2		0	4	4	NONE		0	0	888	888	0	1	BOOKS	4			0	0	888	888	0	0	888	888			0	0	888	888	0
308	1	2	1	0	0	0	0	0	1	1	0	888	999	2	1	0	2	2		0	888	888	NO SUPPLEMENTS		0	0	888	888	1	0	888	888			0	0	888	888	0	0	888	888			0	0	888	888	0
309	1	2	1	0	0	0	0	0	0	1	0	888	999	1	1	0	3	3		0	888	888	BEROCCA		0	0	888	888	1	0	888	888			0	0	888	888	1	0	888	888			0	0	888	888	1
310	1	2	1	1	0	0	0	0	0	1	0	888	999	2	1	0	3	3		0	888	888	BUILDING SUPPLEMENTS, STEROIDS		0	0	888	888	0	0	888	888			0	0	888	888	0	0	888	888			0	0	888	888	0
311	1	2	1	0	0	0	0	0	0	0	0	888	999	0	0	1	888	888		0	888	888	COD LIVER OIL		0	0	888	888	0	0	888	888			0	0	888	888	0	0	888	888			0	0	888	888	0
315	1	2	1	0	0	0	0	0	0	0	0	888	999	0	0	1	888	888		0	888	888	MULTI VITAMIN, GLUCOSOMINE, GARLIC, VITAMIN B		0	0	888	888	0	0	888	888			0	0	888	888	0	0	888	888			0	0	888	888	0
316	1	2	1	1	1	0	0	0	1	1	1	PARTNER IS A GP & ALREADY A FATHER	6	5	1	0	2	2		0	888	888	N/A		0	0	888	888	0	1	BOOKS & INTERNET	4			0	0	888	888	0	1	BOOKS & INTERNET	4			0	0	888	888	0
317	1	2	1	0	0	0	0	0	0	0	0	888	999	0	0	1	888	888		0	4	4	NONE		0	0	888	888	0	0	888	888			0	0	888	888	0	0	888	888			0	0	888	888	0
319	1	2	1	1	0	0	0	0	1	0	0	888	999	2	1	0	2	2		0	888	888	NONE		1	0	888	888	1	0	888	888			1	0	888	888	1	0	888	888			1	0	888	888	1
320	1	2	1	0	0	0	0	0	0	0	0	888	999	0	0	1	888	888		0	888	888	NONE		0	0	888	888	0	0	888	888			0	0	888	888	0	0	888	888			0	0	888	888	0
322	1	2	1	0	0	0	1	0	1	0	0	888	999	2	1	0	3	3		0	888	888	NONE		0	0	888	888	1	0	888	888			0	0	888	888	1	0	888	888			0	0	888	888	0
323	1	2	1	1	0	0	0	0	1	1	0	888	999	3	1	0	3	3		1	3	3	WALNUTS		1	0	888	888	1	0	888	888			1	0	888	888	1	0	888	888			0	0	888	888	0
324	1	2	1	0	0	1	0	0	0	1	0	888	999	2	1	0	2	2		0	888	888	VIT C		0	0	888	888	0	0	888	888			0	0	888	888	0	0	888	888			0	0	888	888	0
325	1	2	1	0	0	1	0	0	0	1	0	888	999	2	1	0	2	2		0	888	888	NONE		1	0	888	888	1	0	888	888			1	0	888	888	1	0	888	888			0	0	888	888	1
326	1	2	1	0	0	0	0	0	0	0	0	888	999	0	0	1	888	888		0	888	888	NONE		0	0	888	888	0	0	888	888			0	0	888	888	0	0	888	888			0	0	888	888	0
327	1	2	1	0	0	0	0	0	0	0	0	888	999	0	0	1	888	888		0	888	888	NONE		0	0	888	888	0	0	888	888			0	0	888	888	0	0	888	888			0	0	888	888	0
328	1	2	1	0	0	0	0	0	1	1	0	888	999	2	1	0	2	2		0	4	4	999		0	0	888	888	0	0	888	888			0	0	888	888	0	0	888	888			0	0	888	888	0
329	1	2	1	1	0	0	0	0	1	1	0	888	999	3	1	0	2	2		0	4	4	999		0	0	888	888	0	0	888	888			0	0	888	888	0	0	888	888			0	0	888	888	0
330	1	2	1	0	0	0	0	1	0	0	0	888	999	1	1	0	3	3		1	3	3	NONE		0	0	888	888	0	0	888	888			0	0	888	888	0	0	888	888			0	0	888	888	0
331	1	2	1	1	0	0	1	0	1	0	0	888	999	3	1	0	3	3		0	888	888	NONE		0	0	888	888	0	1	US	1			0	0	888	888	0	0	888	888			0	0	888	888	0
332	1	2	1	0	0	0	0	0	1	1	0	888	999	2	1	0	2	2		0	888	888	NONE		0	0	888	888	1	0	888	888			0	0	888	888	0	0	888	888			0	0	888	888	0
335	1	2	1	1	1	0	0	0	1	0	0	888	999	3	1	0	3	3		0	888	888	SANATAGEN FATHER TO BE VITAMINS		0	0	888	888	0	0	888	888			0	0	888	888	0	1	BOOK	4			0	0	888	888	0
336	1	2	1	0	0	0	0	0	0	0	0	888	999	0	0	1	888	888		0	888	888	NONE		1	0	888	888	1	0	888	888			1	0	888	888	1	0	888	888			0	0	888	888	0
338	1	2	1	0	0	0	0	0	0	0	0	888	999	0	0	1	888	888		0	888	888	NONE		0	0	888	888	0	0	888	888			0	0	888	888	0	0	888	888			0	0	888	888	0
341	1	2	1	0	0	0	0	0	0	0	0	888	999	0	0	1	888	888		0	4	4	N/A		0	0	888	888	0	0	888	888			0	0	888	888	0	0	888	888			0	0	888	888	0
343	1	2	1	0	0	1	0	0	0	1	0	888	999	2	1	0	2	2		0	888	888	NONE		0	0	888	888	1	0	888	888			0	0	888	888	0	0	888	888			0	0	888	888	0
344	1	2	1	0	0	0	0	0	0	0	0	888	999	0	0	1	888	888		0	4	4	NONE		0	0	888	888	0	0	888	888			0	0	888	888	0	0	888	888			0	0	888	888	0
345	1	2	1	1	1	0	0	0	1	0	0	888	999	3	1	0	3	3		1	3	3	NONE		0	0	888	888	0	1	UNKNOWN	7			0	0	888	888	0	0	888	888			0	0	888	888	0
349	1	2	1	1	0	0	0	0	1	1	0	888	999	3	1	0	3	3		0	888	888	OMEGA 3-6-9		0	0	888	888	0	0	888	888			0	0	888	888	0	0	888	888			0	0	888	888	0
354	1	2	1	1	0	0	0	0	1	1	0	888	999	3	1	0	3	3		0	4	4	NOTHING		0	0	888	888	0	0	888	888			0	0	888	888	0	0	888	888			0	0	888	888	0
355	1	2	1	0	0	0	0	0	0	0	0	888	999	0	0	1	888	888		0	888	888	NONE		1	1	NURSE AT WHITTINGTON HOSP	2	1	0	888	888			0	0	888	888	0	0	888	888			0	0	888	888	0
356	1	2	1	1	0	0	1	1	1	0	0	888	999	4	1	0	3	3		0	4	4	VITAMIN D, VITAMIN B COMPLEX (B1, B2, B3, B6 B12, FOLIC ACID)		0	0	888	888	0	0	888	888			0	0	888	888	0	0	888	888			0	0	888	888	0
357	1	2	1	1	0	0	0	0	1	1	0	888	999	3	1	0	3	3		1	2	2	WELLMAN MULTIVITAMINS - VITABIOTICS		1	0	888	888	1	0	888	888			0	0	888	888	0	0	888	888			0	0	888	888	0
359	1	2	1	0	0	0	0	0	0	0	0	888	999	0	0	1	888	888		0	888	888	N/A		0	0	888	888	0	0	888	888			0	0	888	888	0	0	888	888			0	0	888	888	0
366	1	2	1	0	0	0	0	0	0	1	0	888	999	1	1	0	3	3		1	2	2	NONE		1	0	888	888	0	0	888	888			0	0	888	888	0	0	888	888			0	0	888	888	0
367	1	2	1	1	0	0	0	0	1	1	0	888	999	3	1	0	3	3		0	888	888	SANOTOGEN		0	0	888	888	0	0	888	888			0	0	888	888	0	0	888	888			1	0	888	888	1
368	1	2	1	0	0	0	0	0	0	0	0	888	999	0	0	1	888	888		0	888	888	FOLIC ACID		0	0	888	888	0	1	999	999			0	0	888	888	0	1	999	999			0	0	888	888	0
373	1	2	1	1	0	0	0	0	1	1	0	888	999	3	1	0	3	3		0	888	888	MULTI V		0	0	888	888	1	0	888	888			0	0	888	888	0	0	888	888			0	0	888	888	0
377	1	2	1	0	0	0	0	0	0	1	0	888	999	1	1	0	3	3		1	2	2	NONE		0	0	888	888	0	0	888	888			0	0	888	888	0	0	888	888			0	0	888	888	0
379	1	2	1	0	0	0	0	0	0	0	0	888	999	0	0	1	888	888		0	4	4	999		0	0	888	888	0	0	888	888			0	0	888	888	0	0	888	888			0	0	888	888	0
381	1	2	1	0	0	0	0	0	0	0	0	888	999	0	0	1	888	888		0	4	4	999		0	0	888	888	0	0	888	888			0	0	888	888	0	0	888	888			0	0	888	888	0
383	1	2	1	0	0	0	0	0	1	0	0	888	999	1	1	0	2	2		0	888	888	VITAMIN C		0	0	888	888	0	0	888	888			0	0	888	888	0	0	888	888			0	0	888	888	0
384	1	2	1	1	1	0	0	0	0	1	0	888	999	3	1	0	3	3		0	888	888	N/A		0	0	888	888	0	0	888	888			0	0	888	888	0	0	888	888			0	0	888	888	0
385	1	2	1	0	0	0	0	0	0	0	0	888	999	0	0	1	888	888		1	4	4	999		0	0	888	888	0	0	888	888			0	0	888	888	0	0	888	888			0	0	888	888	0
388	1	2	1	0	0	0	0	0	0	0	0	888	999	0	0	1	888	888		0	888	888	MULTI VITAMINS, GINSENG, GUARANA, CO Q10.		0	0	888	888	0	0	888	888			0	0	888	888	0	0	888	888			0	0	888	888	0
389	1	2	1	1	0	0	1	1	1	0	0	888	999	4	1	0	2	2		1	2	2	FOLIC ACID		1	0	888	888	0	1	RESEARCH	1			0	0	888	888	0	0	888	888			0	0	888	888	0
390	1	2	1	0	0	0	0	0	0	0	0	888	999	0	0	1	888	888		0	888	888	NONE		0	0	888	888	0	0	888	888			0	0	888	888	0	0	888	888			0	0	888	888	0
391	1	2	1	1	0	0	0	0	1	0	0	888	999	2	1	0	2	2		0	4	4	999		0	0	888	888	0	0	888	888			0	0	888	888	0	0	888	888			0	0	888	888	0
392	1	2	1	1	0	0	0	0	1	0	1	MEDICAL SCHOOL	3	3	1	0	2	2		0	888	888	OCCASIONALLY VITAMIN C		0	0	888	888	0	1	SELF	1			0	0	888	888	0	0	888	888			0	0	888	888	0
395	1	2	1	0	0	0	0	0	0	0	0	888	999	0	0	1	888	888		0	888	888	999		0	0	888	888	0	0	888	888			0	0	888	888	0	0	888	888			0	0	888	888	0
400	1	2	1	1	1	0	0	0	1	1	0	888	999	4	1	0	2	2		0	888	888	NONE		1	0	888	888	1	0	888	888			0	0	888	888	0	0	888	888			0	0	888	888	0
401	1	2	1	1	1	0	0	0	1	1	0	888	999	4	1	0	3	3		0	888	888	999		0	0	888	888	0	0	888	888			0	0	888	888	0	0	888	888			0	0	888	888	0
402	1	2	1	1	1	0	0	1	1	0	0	888	999	4	1	0	3	3		1	3	3	MULTI-VITAMINS, ZINC SUPPLEMENT, OMEGA SUPPLEMENT		0	1	NUTRITIONIST	4	0	0	888	888			0	1	NUTRITIONIST	4	0	1	BOOKS	4			0	1	NUTRITIONIST	4	0
403	1	2	1	0	0	0	0	0	0	0	0	888	999	0	0	1	888	888		0	888	888	MULTIBIONTA MULTIVITAMINS. COD LIVER OIL		0	0	888	888	0	0	888	888			0	0	888	888	0	0	888	888			0	0	888	888	0
404	1	2	1	0	0	0	0	0	0	0	0	888	999	0	0	1	888	888		0	888	888	MULTI-VITAMIN SUPPLEMENT (COMBINED)		0	0	888	888	1	0	888	888			0	0	888	888	0	0	888	888			0	0	888	888	0
406	1	2	1	1	1	1	1	1	1	1	0	888	999	7	1	0	2	2		1	2	2	N/A		1	0	888	888	1	1	RESEARCHED	1			1	1	FERTILITY CLINIC	5	1	1	RESEARCH	1			0	0	888	888	0
407	1	2	1	0	0	0	0	0	0	0	0	888	999	0	0	1	888	888		0	4	4	999		0	0	888	888	0	0	888	888			0	0	888	888	0	0	888	888			0	0	888	888	0
408	1	2	1	1	1	0	0	0	1	0	0	888	999	3	1	0	2	2		0	888	888	NONE		0	0	888	888	1	0	888	888			0	0	888	888	0	0	888	888			0	0	888	888	0
410	1	2	1	0	0	0	0	0	0	1	0	888	999	1	1	0	3	3		0	4	4	NONE		0	0	888	888	0	0	888	888			0	0	888	888	0	0	888	888			0	0	888	888	0
411	1	2	1	1	0	0	0	0	1	0	0	888	999	2	1	0	3	3		0	888	888	OCCASIONAL PROTEIN SHAKE, VITAMIN C		0	1	(WIFE = DOCTOR)	2	1	1	INTERNET	3			0	0	888	888	0	0	888	888			0	0	888	888	0
412	1	2	1	0	0	0	0	0	0	0	0	888	999	0	0	1	888	888		0	888	888	NO SUPPLEMENTS TAKEN		0	0	888	888	0	0	888	888			0	0	888	888	0	0	888	888			0	0	888	888	0
415	1	2	1	0	0	1	0	0	0	0	0	888	999	1	1	0	2	2		0	4	4	NONE		0	0	888	888	0	0	888	888			0	0	888	888	0	0	888	888			0	0	888	888	0
417	1	2	1	1	0	0	0	0	1	0	0	888	999	2	1	0	3	3		1	3	3	FERTILITY SUPPLEMENT FOR MEN		0	0	888	888	0	1	999	999			0	0	888	888	0	1	999	999			0	0	888	888	0
418	1	2	1	0	0	0	0	0	0	0	0	888	999	0	0	1	888	888		0	4	4	NONE		0	0	888	888	0	0	888	888			0	0	888	888	0	0	888	888			0	0	888	888	0
422	1	2	1	1	0	1	0	0	0	0	0	888	999	2	1	0	3	3		0	888	888	VITABIOTICS FOR MEN		0	0	888	888	1	0	888	888			0	0	888	888	1	0	888	888			0	0	888	888	1
426	1	2	1	1	0	0	0	0	1	0	0	888	999	2	1	0	3	3		0	888	888	MAXIMUSCLE CYCLONE		0	0	888	888	0	0	888	888			0	0	888	888	0	0	888	888			0	0	888	888	0
429	1	2	1	1	0	0	0	0	1	1	0	888	999	3	1	0	3	3		0	4	4	999		0	0	888	888	0	0	888	888			0	0	888	888	0	0	888	888			0	0	888	888	0
430	1	2	1	1	0	0	0	1	1	1	0	888	999	4	1	0	3	3		0	3	3	VITAMIN C & D		0	0	888	888	1	0	888	888			0	0	888	888	1	0	888	888			0	0	888	888	1
434	1	2	1	1	0	0	0	1	1	1	0	888	999	4	1	0	3	3		0	888	888	OCCASIONALLY = C VITAMIN, LUCOZADE SPORTS		1	0	888	888	0	0	888	888			0	0	888	888	0	0	888	888			0	0	888	888	1
435	1	2	1	0	0	1	0	0	0	0	0	888	999	1	1	0	2	2		0	4	4	COD LIVER OIL CAPSULES		0	0	888	888	0	0	888	888			0	0	888	888	0	0	888	888			0	0	888	888	0
436	1	2	1	1	0	0	0	0	1	0	0	888	999	2	1	0	2	2		1	1	1	NONE		0	0	888	888	0	0	888	888			0	0	888	888	0	0	888	888			0	0	888	888	0
437	1	2	1	1	0	1	1	0	0	1	0	888	999	4	1	0	2	2		0	888	888	MULTIVITAMINS		0	0	888	888	0	0	888	888			0	0	888	888	0	0	888	888			0	0	888	888	0
438	1	2	1	0	0	0	0	0	1	1	0	888	999	2	1	0	2	2		0	888	888	999		0	0	888	888	0	0	888	888			0	0	888	888	0	0	888	888			0	0	888	888	0
441	1	2	1	1	0	0	0	0	1	0	0	NHS WEBSITE	888	2	1	0	3	3		0	888	888	CENTRUM MULTIVITAMINS. OMEGA 3 FISH OIL. WHEY PROTEIN.		0	0	888	888	1	0	888	888			0	0	888	888	1	0	888	888			0	0	888	888	0
442	1	2	1	1	1	1	1	0	1	1	0	888	999	6	1	0	3	3		0	888	888	NIL		0	0	888	888	0	0	888	888			0	0	888	888	0	0	888	888			0	0	888	888	0
443	1	2	1	1	1	0	0	0	0	0	1	IPAD APP	11	3	1	0	2	2		0	4	4	999		0	0	888	888	1	0	888	888			0	0	888	888	1	0	888	888			0	0	888	888	0
446	1	2	1	1	0	0	0	0	1	0	0	888	999	2	1	0	2	2		1	2	2	COD LIVER OIL		1	0	888	888	0	0	888	888			0	0	888	888	0	0	888	888			0	0	888	888	0
448	1	2	1	0	0	0	0	0	0	0	0	888	999	0	0	1	888	888		0	888	888	VITAMIN D. OMEGA 3.		0	0	888	888	0	0	888	888			0	0	888	888	0	0	888	888			0	0	888	888	0
449	1	2	1	0	0	0	0	0	1	1	0	888	999	2	1	0	3	3		0	888	888	MAXIMUSCLE PROTEIN POWDERS.		0	0	888	888	1	0	888	888			0	0	888	888	1	0	888	888			0	0	888	888	0
451	1	2	1	1	1	0	0	0	0	0	0	888	999	2	1	0	3	3		0	888	888	999		0	0	888	888	1	0	888	888			0	0	888	888	0	0	888	888			0	0	888	888	1
453	1	2	1	0	0	0	0	0	0	0	0	888	999	0	0	1	888	888		0	888	888	NONE		0	0	888	888	0	0	888	888			0	0	888	888	0	0	888	888			0	0	888	888	0
454	1	2	1	1	0	0	0	0	0	1	0	888	999	2	1	0	3	3		0	888	888	MULTI VITAMINS		0	0	888	888	1	0	888	888			0	0	888	888	1	0	888	888			0	0	888	888	0
458	1	2	1	0	0	0	0	0	0	1	0	888	999	1	1	0	3	3		0	888	888	WELLMAN		0	0	888	888	1	0	888	888			0	0	888	888	0	0	888	888			0	0	888	888	0
459	1	2	1	1	0	0	0	0	1	0	0	888	999	2	1	0	2	2		0	4	4	999		0	0	888	888	0	0	888	888			0	0	888	888	0	0	888	888			0	0	888	888	0
462	1	2	1	1	1	0	0	0	1	1	0	888	999	4	1	0	2	2		1	3	3	GENERIC FATHER TO BE VITAMIN SUPPLEMENT.		1	0	888	888	0	0	888	888			1	0	888	888	0	0	888	888			0	0	888	888	0
464	1	2	1	1	1	0	1	1	1	0	0	888	999	5	1	0	3	3		1	2	2	VARIOUS DRUGS ASSOCIATED WITH IVF - MAINLY HORMONES.		0	1	999	999	0	0	888	888			0	0	888	888	0	0	888	888			0	0	888	888	0
1002	2	2	1	0	0	0	0	1	0	1	0	888	999	2	1	0	2	2		0	888	888	999		1	0	888	888	0	0	888	888			0	0	888	888	0	0	888	888			0	0	888	888	0
1004	2	2	1	1	0	0	0	0	1	0	0	888	999	2	1	0	3	3		0	888	888	NONE		0	0	888	888	1	0	888	888			0	0	888	888	0	0	888	888			0	0	888	888	0
1012	2	2	1	1	1	1	1	1	1	1	1	WORD OF MOUTH	1	8	1	0	3	3		0	2	2	NONE FOR ME, BUT FOLIC ACID AND PREGNANCY CARE FOR WIFE		1	0	888	888	0	0	888	888			1	0	888	888	0	0	888	888			0	0	888	888	0
1013	2	2	1	1	1	0	1	0	1	0	0	888	999	4	1	0	3	3		0	888	888	999		0	0	888	888	0	0	888	888			0	0	888	888	0	0	888	888			0	0	888	888	0
1017	2	2	1	0	999	999	999	999	999	999	999	888	999	999	999	999	3	3		0	888	888	999		0	0	888	888	0	0	888	888			0	0	888	888	0	0	888	888			0	0	888	888	0
1018	2	2	1	0	0	0	0	0	0	0	0	888	999	0	0	1	888	888		0	888	888	NONE		0	0	888	888	0	0	888	888			0	0	888	888	0	0	888	888			0	0	888	888	0
1030	2	2	1	0	0	0	0	0	0	0	0	888	999	0	0	1	888	888		0	4	4	NONE		0	0	888	888	0	0	888	888			0	0	888	888	0	0	888	888			0	0	888	888	0
1031	2	2	1	0	0	0	0	0	0	1	0	888	999	1	1	0	3	3		0	4	4	999		0	0	888	888	0	0	888	888			0	0	888	888	0	0	888	888			0	0	888	888	0
1033	2	2	1	999	999	999	999	999	999	999	999	888	999	999	999	999	999	999		999	999	999	999		1	1	MIDWIFE	1	1	0	888	888			1	1	999	999	0	0	888	888			1	1	MIDWIFE	2	0
1038	2	2	1	1	0	0	0	0	1	0	0	888	999	2	1	0	3	3		1	2	2	999		0	0	888	888	0	0	888	888			0	0	888	888	0	0	888	888			0	0	888	888	0
1040	2	2	1	0	1	0	0	0	0	0	0	888	999	1	1	0	2	2		0	888	888	NONE		0	0	888	888	0	0	888	888			0	0	888	888	0	0	888	888			0	0	888	888	0
1044	2	2	1	0	0	0	0	0	0	0	0	888	999	0	0	1	888	888		0	888	888	NONE		0	0	888	888	0	1	PREVIOUS PREGNANCY	2			0	0	888	888	0	1	PREVIOUS PREGNANCY	2			0	0	888	888	0
1049	2	2	1	1	0	0	0	0	1	0	0	888	999	2	1	0	2	2		0	888	888	FOLIC ACID		0	0	888	888	1	0	888	888			0	0	888	888	0	0	888	888			0	0	888	888	0
1050	2	2	1	1	0	0	0	1	1	1	0	888	999	4	1	0	3	3		0	888	888	MUSCLE GAIN, SUPPLEMENT		1	0	888	888	1	0	888	888			0	0	888	888	0	0	888	888			0	0	888	888	0
1051	2	2	1	0	0	0	0	0	0	1	0	888	999	1	1	0	3	3		0	1	1	999		0	0	888	888	0	0	888	888			0	0	888	888	0	0	888	888			0	0	888	888	0
1053	2	2	1	0	0	0	0	0	0	0	0	888	999	0	0	1	888	888		0	888	888	NONE		0	0	888	888	0	0	888	888			0	0	888	888	0	0	888	888			0	0	888	888	0
1056	2	2	1	1	0	0	0	0	1	1	0	888	999	3	1	0	2	2		0	888	888	NONE		0	0	888	888	0	0	888	888			0	0	888	888	0	0	888	888			0	0	888	888	0
1057	2	2	1	0	0	0	0	0	0	1	0	888	999	1	1	0	2	2		0	888	888	999		0	0	888	888	0	0	888	888			0	0	888	888	0	0	888	888			0	0	888	888	0
1059	2	2	1	1	0	0	1	0	1	1	0	888	999	4	1	0	2	2		1	3	3	999		1	0	888	888	1	0	888	888			0	0	888	888	0	0	888	888			0	0	888	888	0
1064	2	2	1	0	0	1	0	0	0	1	0	888	999	2	1	0	1	1		0	2	2	999		1	0	888	888	0	0	888	888			0	0	888	888	0	1	999	999			1	0	888	888	0
1065	2	2	1	1	0	0	0	0	1	1	0	888	999	3	1	0	3	3		1	3	3	FOLIC ACID. MULTI VITAMINS.		0	1	999	999	0	0	888	888			0	1	999	999	0	0	888	888			0	1	999	999	0
1069	2	2	1	0	0	0	0	0	0	0	0	888	999	0	0	1	888	888		0	888	888	WHEY PROTIEN SHAKES FOR FITNESS		0	1	999	999	0	0	888	888			0	0	888	888	0	0	888	888			0	0	888	888	0
1070	2	2	1	0	0	0	0	0	0	0	0	888	999	0	0	1	888	888		0	888	888	NONE		0	0	888	888	0	0	888	888			0	0	888	888	0	0	888	888			0	0	888	888	0
1071	2	2	1	0	1	0	0	0	0	0	0	888	999	1	1	0	3	3		0	3	3	NONE		0	0	888	888	0	0	888	888			0	0	888	888	0	0	888	888			0	0	888	888	0
1072	2	2	1	1	1	0	0	0	0	0	0	888	999	2	1	0	3	3		0	888	888	NONE		1	0	888	888	0	0	888	888			0	0	888	888	0	0	888	888			0	0	888	888	0
1073	2	2	1	0	0	0	0	0	0	0	0	888	999	0	0	1	888	888		0	888	888	NONE		0	0	888	888	0	0	888	888			0	0	888	888	0	0	888	888			0	0	888	888	0
1077	2	2	1	1	0	0	0	0	1	0	0	888	999	2	1	0	2	2		0	4	4	NONE		0	0	888	888	0	0	888	888			0	0	888	888	0	0	888	888			0	0	888	888	0
1078	2	2	1	0	0	0	0	0	0	0	0	888	999	0	0	1	888	888		0	888	888	999		1	0	888	888	0	0	888	888			0	0	888	888	0	0	888	888			0	0	888	888	0
1083	2	2	1	0	0	0	0	0	0	1	0	888	999	1	1	0	2	2		0	888	888	NONE		0	0	888	888	0	1	WIFE	9			0	0	888	888	0	1	WIFE	9			0	0	888	888	0
1085	2	2	1	1	1	1	1	1	1	1	0	888	999	7	1	0	3	3		0	888	888	FOLIC ACID		0	0	888	888	0	0	888	888			0	0	888	888	0	0	888	888			0	0	888	888	0
1102	2	2	1	0	0	0	0	0	1	0	0	888	999	1	1	0	2	2		0	888	888	999		0	0	888	888	0	0	888	888			0	0	888	888	0	0	888	888			0	0	888	888	0
1103	2	2	1	1	1	0	0	1	1	0	0	888	999	4	1	0	3	3		0	3	3	N/A		0	0	888	888	0	1	YOURSELF	1			0	0	888	888	0	1	YOURSELF	1			0	0	888	888	0
1108	2	2	1	1	0	0	0	0	1	0	0	888	999	2	1	0	3	3		0	888	888	NONE		0	0	888	888	1	1	INTERNET	3			0	0	888	888	0	0	888	888			0	0	888	888	0
1111	2	2	1	0	0	0	0	0	0	0	0	888	999	0	0	1	888	888		0	888	888	NONE		0	0	888	888	0	0	888	888			0	0	888	888	0	0	888	888			0	0	888	888	0
1114	2	2	1	1	0	0	0	1	0	0	0	888	999	2	1	0	2	2		1	2	2	NONE		0	0	888	888	0	0	888	888			0	0	888	888	0	0	888	888			0	0	888	888	0
1119	2	2	1	0	0	0	0	0	0	0	1	HAVE 3 KIDS ALREADY	6	1	1	0	3	3		0	4	4	NONE		0	0	888	888	0	0	888	888			0	0	888	888	0	0	888	888			0	0	888	888	0
1125	2	2	1	1	0	0	0	0	1	0	0	888	999	2	1	0	1	1		0	888	888	ZINC + MULTIVITAMINS		0	0	888	888	0	0	888	888			0	0	888	888	0	0	888	888			0	0	888	888	0
1126	2	2	1	0	0	0	0	0	0	1	0	888	999	1	1	0	3	3		0	888	888	NONE		0	0	888	888	1	1	999	999			0	0	888	888	1	1	999	999			0	0	888	888	0
1127	2	2	1	1	1	1	1	0	1	1	0	888	999	6	1	0	3	3		0	888	888	NONE		0	0	888	888	1	0	888	888			0	0	888	888	1	0	888	888			0	0	888	888	0
1128	2	2	1	1	0	0	0	0	1	0	0	888	999	2	1	0	2	2		0	888	888	999		0	0	888	888	0	0	888	888			0	0	888	888	0	0	888	888			0	0	888	888	0
1134	2	2	1	0	0	0	0	0	1	1	0	888	999	2	1	0	2	2		0	4	4	999		0	0	888	888	1	0	888	888			0	0	888	888	1	0	888	888			0	0	888	888	0
1136	2	2	1	1	1	1	1	1	1	1	0	888	999	7	1	0	3	3		0	4	4	999		1	0	888	888	0	0	888	888			0	0	888	888	1	0	888	888			0	0	888	888	0
1141	2	2	1	0	0	0	0	0	0	0	0	888	999	0	0	1	888	888		0	888	888	NONE		1	0	888	888	0	0	888	888			0	0	888	888	0	0	888	888			0	0	888	888	0
1142	2	2	1	0	0	0	0	0	0	0	0	888	999	0	0	1	888	888		0	888	888	999		0	0	888	888	0	0	888	888			0	0	888	888	0	0	888	888			0	0	888	888	0
1144	2	2	1	1	0	1	1	0	1	0	0	888	999	4	1	0	3	3		1	3	3	TABLET PREGNACARE FOR HIM AND HER		1	0	888	888	0	0	888	888			1	0	888	888	0	0	888	888			0	0	888	888	0
1147	2	2	1	1	0	0	0	0	1	1	0	888	999	3	1	0	3	3		0	4	4	NONE		0	0	888	888	0	0	888	888			0	0	888	888	0	0	888	888			0	0	888	888	0
1148	2	2	1	0	0	0	0	0	0	0	1	FLU JAB POSTER AT GP	8	1	1	0	2	2		0	4	4	NONE		0	0	888	888	1	0	888	888			1	0	888	888	0	0	888	888			0	0	888	888	0
1169	2	2	1	1	0	0	0	0	1	0	0	888	999	2	1	0	3	3		0	2	2	OMEGA FISH OILS & ACAI BERRY		0	0	888	888	0	0	888	888			0	0	888	888	0	0	888	888			0	0	888	888	0
1177	2	2	1	0	0	0	0	0	0	0	1	TV	8	1	1	0	3	3		0	888	888	PROTEIN SHAKES		0	0	888	888	0	0	888	888			0	0	888	888	0	0	888	888			0	0	888	888	0
1193	2	2	1	1	0	0	0	0	1	1	0	888	999	3	1	0	3	3		0	2	2	FOLIC ACID		1	0	888	888	0	1	INTERNET	3			0	0	888	888	1	0	888	888			0	0	888	888	0
1196	2	2	1	1	0	0	0	1	1	1	0	888	999	4	1	0	2	2		1	3	3	999		1	0	888	888	0	0	888	888			1	0	888	888	0	0	888	888			0	0	888	888	0
1197	2	2	1	1	0	0	0	0	1	0	0	888	999	2	1	0	2	2		0	888	888	N/A		0	0	888	888	0	1	ONLINE	3			0	0	888	888	0	1	ONLINE	3			0	0	888	888	0
1212	2	2	1	0	0	0	0	0	0	0	0	888	999	0	0	1	888	888		0	4	4	NONE		0	0	888	888	0	0	888	888			0	0	888	888	0	0	888	888			0	0	888	888	0
1216	2	2	1	0	0	0	0	0	0	0	0	888	999	0	0	1	888	888		0	888	888	BOOTS MULTIVITAMIN. HOMY GOAT WEED		0	0	888	888	0	0	888	888			0	0	888	888	0	0	888	888			0	0	888	888	0
1217	2	2	1	1	0	1	0	0	1	1	0	888	999	4	1	0	3	3		0	4	4	NONE		0	0	888	888	0	1	999	999			0	0	888	888	0	0	888	888			0	0	888	888	0
1225	2	2	1	1	0	0	0	0	1	1	0	888	999	3	1	0	2	2		1	2	2	VITAMIN B & C		0	0	888	888	0	0	888	888			0	0	888	888	0	0	888	888			0	0	888	888	0
1226	2	2	1	0	0	0	0	0	0	0	0	888	999	0	0	1	888	888		0	888	888	CREATINE		0	0	888	888	0	0	888	888			0	0	888	888	0	0	888	888			0	0	888	888	0
1227	2	2	1	0	0	0	0	0	0	1	0	888	999	1	1	0	3	3		0	888	888	NONE		0	0	888	888	0	0	888	888			0	0	888	888	0	0	888	888			0	0	888	888	0
1230	2	2	1	0	0	0	0	0	0	0	0	888	999	0	0	1	888	888		0	888	888	NONE		0	0	888	888	0	0	888	888			0	0	888	888	0	0	888	888			0	0	888	888	0
1234	2	2	1	1	0	0	1	0	0	0	0	888	999	2	1	0	2	2		0	4	4	N/A		0	0	888	888	0	0	888	888			0	0	888	888	0	0	888	888			0	0	888	888	0
1235	2	2	1	1	1	0	0	0	1	1	0	888	999	4	1	0	3	3		0	888	888	COD LIVER OIL		0	0	888	888	0	1	FOUND OUT OURSELVES	1			0	0	888	888	0	1	FOUND OUT OURSELVES	1			0	0	888	888	0
1243	2	2	1	1	0	0	0	0	1	1	0	888	999	3	1	0	2	2		0	4	4	999		0	0	888	888	0	1	BOOK	4			0	0	888	888	0	1	BOOK	4			0	0	888	888	0
1246	2	2	1	0	0	0	0	0	0	0	0	888	999	0	0	1	888	888		0	888	888	VITAMIN C SUPPLEMENT (BEROCCA)		0	0	888	888	0	0	888	888			0	0	888	888	0	0	888	888			0	0	888	888	0
1249	2	2	1	0	0	0	0	0	1	1	0	888	999	2	1	0	2	2		0	3	3	NONE		0	0	888	888	0	1	HEALTH FOOD STORE	6			0	0	888	888	0	1	HEALTH FOOD STORE	6			0	0	888	888	0
1256	2	2	1	1	0	0	0	0	1	1	1	@ WORK (IM A PAED NURSE)	3	4	1	0	3	3		0	2	2	NONE		0	0	888	888	0	0	888	888			0	0	888	888	0	0	888	888			0	0	888	888	0
1258	2	2	1	0	0	1	0	0	1	0	0	888	999	2	1	0	3	3		0	4	4	NONE		0	0	888	888	1	0	888	888			0	0	888	888	0	0	888	888			0	0	888	888	0
1266	2	2	1	0	0	0	0	0	0	0	0	888	999	0	0	1	888	888		0	888	888	N/A		0	0	888	888	0	0	888	888			0	0	888	888	0	0	888	888			0	0	888	888	0
1267	2	2	1	1	0	0	0	0	1	1	0	888	999	3	1	0	3	3		0	3	3	NONE		0	0	888	888	1	0	888	888			0	0	888	888	1	0	888	888			0	0	888	888	0
1271	2	2	1	1	0	0	0	0	1	1	0	888	999	3	1	0	3	3		1	3	3	PERUVIA MACCA. VITABIOTICS WELLMAN CONCEPTION, INDIAN SPIRULINA		0	0	888	888	1	0	888	888			0	0	888	888	0	0	888	888			0	0	888	888	0
1273	2	2	1	1	1	0	0	0	1	0	0	888	999	3	1	0	3	3		1	2	2	NONE		0	0	888	888	0	0	888	888			0	0	888	888	0	0	888	888			0	0	888	888	0
1279	2	2	1	1	0	1	1	1	1	1	0	888	999	6	1	0	3	3		1	3	3	MALE CONCEPTION TABLETS - MIXTURE OF VITAMINS		1	0	888	888	1	1	INTERNET	3			1	0	888	888	1	1	INTERNET	3			1	0	888	888	1
1281	2	2	1	0	0	0	0	0	1	0	0	888	999	1	1	0	2	2		1	3	3	NONE		1	0	888	888	0	0	888	888			0	0	888	888	0	0	888	888			0	0	888	888	0
1287	2	2	1	1	0	0	0	0	1	0	0	888	999	2	1	0	3	3		0	888	888	999		0	0	888	888	0	0	888	888			0	0	888	888	0	0	888	888			0	0	888	888	0
1297	2	2	1	0	0	0	0	0	0	0	0	888	999	0	0	1	888	888		0	888	888	NONE		0	0	888	888	0	0	888	888			0	0	888	888	0	0	888	888			0	0	888	888	0
1299	2	2	1	1	1	0	0	0	1	0	0	888	999	3	1	0	3	3		0	4	4	999		0	0	888	888	1	0	888	888			0	0	888	888	0	0	888	888			0	0	888	888	0
1302	2	2	1	1	0	0	0	0	1	0	0	888	999	2	1	0	3	3		0	4	4	OCCASIONAL BERROCCA TABLETS		0	0	888	888	0	0	888	888			0	0	888	888	0	0	888	888			0	0	888	888	0
1309	2	2	1	1	1	0	0	0	1	0	0	888	999	3	1	0	3	3		0	4	4	999		0	0	888	888	0	1	999	999			0	0	888	888	0	1	999	999			0	0	888	888	0
1311	2	2	1	0	0	0	0	0	0	1	0	888	999	1	1	0	2	2		0	4	4	MULTI MENS VITAMIN WITH FOLIC ACID AND ZINC		1	0	888	888	1	1	999	999			0	0	888	888	0	0	888	888			0	0	888	888	0
1316	2	2	1	0	0	0	0	0	0	1	0	888	999	1	1	0	2	2		0	888	888	NONE		0	0	888	888	0	0	888	888			0	0	888	888	0	0	888	888			0	0	888	888	0
1318	2	2	1	0	0	0	0	0	0	0	0	888	999	0	0	1	888	888		0	888	888	NONE		0	0	888	888	0	0	888	888			0	0	888	888	0	0	888	888			0	0	888	888	0
1324	2	2	1	1	1	1	1	0	1	1	0	888	999	6	1	0	2	2		0	888	888	NONE		0	0	888	888	1	1	INTERNET	3			0	0	888	888	0	0	888	888			0	0	888	888	0
1331	2	2	1	0	0	1	0	1	1	0	0	888	999	3	1	0	3	3		0	888	888	NONE. ALL NATURAL!		1	0	888	888	0	0	888	888			1	0	888	888	0	0	888	888			1	0	888	888	0
1336	2	2	1	0	0	0	0	1	1	0	0	888	999	2	1	0	3	3		0	888	888	NONE		0	0	888	888	0	0	888	888			0	0	888	888	0	0	888	888			0	0	888	888	0
1338	2	2	1	0	0	0	0	0	0	0	0	888	999	0	0	1	888	888		0	4	4	999		0	0	888	888	0	0	888	888			0	0	888	888	0	0	888	888			0	0	888	888	0
1339	2	2	1	0	0	0	0	0	0	0	0	888	999	0	0	1	2	2		0	4	4	NONE		0	0	888	888	0	0	888	888			0	0	888	888	0	0	888	888			0	0	888	888	0
1344	2	2	1	1	0	0	0	0	1	0	0	888	999	2	1	0	2	2		0	888	888	NONE		0	0	888	888	0	1	GENERAL PRIOR AWARENESS	8			0	0	888	888	0	1	GENERAL PRIOR AWARENESS	8			0	0	888	888	0
1345	2	2	1	1	0	0	0	0	1	0	0	888	999	2	1	0	2	2		0	888	888	WELLMAN CONCEPTION VITAMINS		0	0	888	888	0	0	888	888			0	0	888	888	0	0	888	888			0	0	888	888	0
1346	2	2	1	1	0	0	0	0	1	0	0	888	999	2	1	0	2	2		0	888	888	999		1	0	888	888	0	0	888	888			0	0	888	888	0	0	888	888			0	0	888	888	0
1363	2	2	1	0	0	0	0	0	0	0	0	888	999	0	0	1	888	888		0	4	4	MULTIVITAMINS. FOLIC ACID		0	0	888	888	0	0	888	888			0	0	888	888	0	0	888	888			0	0	888	888	0
1370	2	2	1	0	1	0	0	1	1	1	0	888	999	4	1	0	3	3		0	4	4	NONE		0	0	888	888	0	0	888	888			0	0	888	888	0	0	888	888			0	0	888	888	0
1371	2	2	1	0	0	0	0	1	1	0	0	888	999	2	1	0	2	2		0	888	888	COD LIVER OIL, MULTI VITAMINS		0	0	888	888	0	0	888	888			0	0	888	888	0	0	888	888			0	0	888	888	0
1377	2	2	1	1	0	0	0	0	1	0	0	INTERNET - GOOGLE SEARCH	888	2	1	0	3	3		0	4	4	999		0	0	888	888	0	0	888	888			0	0	888	888	0	0	888	888			0	0	888	888	0
1386	2	2	1	1	1	1	0	1	1	1	0	888	999	6	1	0	3	3		1	3	3	WELLMAN FERTILITY. CHROMIUM. SELENIUM		0	1	FORESIGHT CLINIC	9	1	1	INTERNET	3			0	1	FORESIGHT CLINIC	9	1	1	INTERNET	3			0	0	888	888	0
1390	2	2	1	1	0	0	0	0	1	1	0	888	999	3	1	0	2	2		0	888	888	NONE		0	0	888	888	1	1	FINDING OUT OURSELVES	1			0	0	888	888	1	1	FINDING OUT OURSELVES	1			0	0	888	888	1
1391	2	2	1	0	0	0	0	0	1	0	1	TV	8	2	1	0	1	1		0	888	888	999		0	0	888	888	0	0	888	888			0	0	888	888	0	0	888	888			0	0	888	888	0
1392	2	2	1	0	0	0	0	0	0	0	0	888	999	0	0	1	2	2		0	4	4	NO		0	0	888	888	0	0	888	888			0	0	888	888	0	0	888	888			0	0	888	888	0
1394	2	2	1	0	0	0	0	0	1	0	0	888	999	1	1	0	3	3		0	888	888	999		1	0	888	888	0	0	888	888			0	0	888	888	0	0	888	888			0	0	888	888	0
1395	2	2	1	0	0	0	0	0	0	0	0	888	999	0	0	1	888	888		0	4	4	999		0	0	888	888	0	0	888	888			0	0	888	888	0	0	888	888			0	0	888	888	0
1396	2	2	1	0	0	0	0	0	0	0	0	888	999	0	0	1	888	888		0	888	888	NONE		0	0	888	888	0	0	888	888			0	0	888	888	0	0	888	888			0	0	888	888	0
1398	2	2	1	1	0	0	0	0	1	0	1	NEWSPAPERS	8	3	1	0	3	3		0	888	888	N/A		0	0	888	888	0	0	888	888			0	0	888	888	0	0	888	888			0	0	888	888	0
1399	2	2	1	0	0	0	1	0	0	0	0	888	999	1	1	0	2	2		0	888	888	NONE		0	0	888	888	0	0	888	888			0	0	888	888	0	0	888	888			0	0	888	888	0
1402	2	2	1	0	0	0	0	0	0	0	0	888	999	0	0	1	888	888		0	888	888	NONE		0	0	888	888	1	0	888	888			0	0	888	888	1	0	888	888			0	0	888	888	0
1404	2	2	1	1	0	0	0	0	1	0	0	888	999	2	1	0	3	3		0	888	888	ZMA - ZINC + MAGNESIUM COMPLEX. WHEY PROTEIN. VITAMIN AND MINERALS COMPLEX		0	0	888	888	0	1	INTERNET	3			0	0	888	888	0	0	888	888			0	0	888	888	0
1409	2	2	1	0	0	0	0	0	0	1	0	888	999	1	1	0	999	999		0	888	888	999		0	0	888	888	0	0	888	888			0	0	888	888	0	0	888	888			0	0	888	888	0
1414	2	2	1	1	0	0	0	1	1	1	0	888	999	4	1	0	3	3		0	888	888	999		0	0	888	888	0	0	888	888			0	0	888	888	0	0	888	888			0	0	888	888	0
1415	2	2	1	0	0	0	0	0	0	0	0	888	999	0	0	1	888	888		0	888	888	FOLIC ACID		0	0	888	888	0	0	888	888			0	0	888	888	0	0	888	888			0	0	888	888	0
1416	2	2	1	0	0	0	0	0	1	0	0	888	999	1	1	0	3	3		0	4	4	999		0	0	888	888	0	1	999	999			0	0	888	888	0	0	888	888			0	0	888	888	0
1417	2	2	1	0	0	0	0	0	0	0	1	FILM " THE BIGLEBOWSKI"-JULIETTE LEWIS' CHARACTER HUGGED HER KNEES TO HER CHEST AND ROLLED AROUND ON HER BACK TO INCREASE CHANCE OF CONCEPTION	11	1	1	0	3	3		0	888	888	BOOTS RE-ENERGISE ORANGE FIZZY ONES		0	0	888	888	0	1	WIFE	9			0	0	888	888	0	1	WIFE	9			0	0	888	888	0
1419	2	2	1	1	0	0	1	1	0	1	0	888	999	4	1	0	2	2		0	888	888	FOLIC		1	0	888	888	0	0	888	888			0	0	888	888	0	0	888	888			0	0	888	888	0
1420	2	2	1	0	999	999	999	999	999	999	999	888	999	999	999	999	999	999		0	888	888	BIOCARE AGE PLUS, MALE FORTE, B COMPLEX, COQ10 ZINC, VITAMIN C.		0	1	NUTRITIONAL THERAPIST	4	0	0	888	888			0	1	NUTRITIONAL THERAPIST	4	0	0	888	888			0	1	NUTRITIONAL THERAPIST	4	0
1421	2	2	1	1	0	0	0	0	1	0	0	888	999	2	1	0	3	3		0	888	888	PREGNACARE		0	0	888	888	0	0	888	888			0	0	888	888	0	1	999	999			0	0	888	888	0
1422	2	2	1	0	0	0	0	0	0	0	0	888	999	0	0	1	888	888		0	888	888	NONE		0	0	888	888	0	1	WIFE	9			0	0	888	888	0	0	888	888			0	0	888	888	0
1424	2	2	1	1	0	0	0	0	1	1	0	888	999	3	1	0	2	2		0	888	888	WELLMAN MULTI VITAMIN (SPORTS). COD LIVER OIL. DIGESTIVE ENZYMES		0	0	888	888	1	0	888	888			0	0	888	888	1	0	888	888			0	0	888	888	0
1425	2	2	1	0	0	0	0	0	0	1	0	888	999	1	1	0	3	3		0	888	888	ELECTROLYTE SPORTS DRINKS (PRE & DURING EXERCISE).PROTEIN RECOVERY SHAKES (AFTER EXERCISE)		0	0	888	888	0	0	888	888			0	0	888	888	0	0	888	888			0	0	888	888	0
1426	2	2	1	0	0	0	0	0	0	1	0	888	999	1	1	0	3	3		0	888	888	NONE		0	0	888	888	0	0	888	888			0	0	888	888	0	0	888	888			0	0	888	888	0
1427	2	2	1	0	0	0	0	0	0	0	0	888	999	0	0	1	888	888		0	888	888	999		0	0	888	888	0	0	888	888			0	0	888	888	0	0	888	888			0	0	888	888	0
1429	2	2	1	1	0	0	1	0	1	0	0	888	999	3	1	0	3	3		0	888	888	NOTHING		1	0	888	888	0	0	888	888			1	0	888	888	0	0	888	888			1	0	888	888	0
1433	2	2	1	0	0	0	1	0	1	0	0	888	999	2	1	0	2	2		0	888	888	NONE		0	0	888	888	0	0	888	888			0	0	888	888	0	0	888	888			0	0	888	888	0
2001	3	2	1	0	0	0	1	0	0	0	0	888	999	1	1	0	2	2		0	888	888	NONE		0	0	888	888	0	0	888	888			0	0	888	888	0	0	888	888			0	0	888	888	0
2002	3	2	1	0	0	0	0	0	0	0	0	888	999	0	0	1	888	888		0	888	888	999		0	0	888	888	0	0	888	888			0	0	888	888	0	0	888	888			0	0	888	888	0
2003	3	2	1	1	1	0	0	0	1	1	0	888	999	4	1	0	3	3		0	4	4	VITAMIN B COMPLEX. FISH OILS. OMEGA 3, 6, 9 OILS		0	0	888	888	1	0	888	888			0	0	888	888	1	0	888	888			0	0	888	888	1
2004	3	2	1	0	0	0	0	0	0	0	0	888	999	0	0	1	888	888		999	4	4	NONE		0	0	888	888	0	0	888	888			0	0	888	888	0	0	888	888			0	0	888	888	0
2006	3	2	1	0	0	1	0	0	0	1	0	888	999	2	1	0	2	2		0	4	4	999		0	0	888	888	0	0	888	888			0	0	888	888	0	0	888	888			0	0	888	888	0
2007	3	2	1	999	999	999	999	999	999	999	999	888	999	999	999	999	999	999		999	999	999	999		0	0	888	888	0	0	888	888			0	0	888	888	0	0	888	888			0	0	888	888	0
2013	3	2	1	1	1	0	0	0	1	1	0	888	999	4	1	0	3	3		0	4	4	N/A		0	0	888	888	0	0	888	888			0	0	888	888	0	0	888	888			0	0	888	888	0
2014	3	2	1	0	0	0	0	0	0	0	0	888	999	0	0	1	888	888		0	4	4	NONE		0	0	888	888	0	0	888	888			0	0	888	888	0	0	888	888			0	0	888	888	0
2015	3	2	1	0	0	0	0	0	1	0	0	888	999	1	1	0	2	2		0	4	4	999		0	0	888	888	0	0	888	888			0	0	888	888	0	0	888	888			0	0	888	888	0
2016	3	2	1	1	0	0	0	0	1	1	0	888	999	3	1	0	2	2		0	888	888	NONE		0	1	GYNAECOLOGIST	9	0	0	888	888			0	0	888	888	0	0	888	888			0	0	888	888	0
2017	3	2	1	0	0	0	0	0	0	0	1	999	999	1	1	1	3	3		1	3	3	NO		0	0	888	888	0	0	888	888			0	0	888	888	0	0	888	888			0	0	888	888	0
2018	3	2	1	0	0	0	0	0	0	0	0	888	999	0	0	1	888	888		0	888	888	999		0	0	888	888	0	0	888	888			0	0	888	888	0	0	888	888			0	0	888	888	0
2019	3	2	1	1	0	1	0	0	1	0	0	888	999	3	1	0	3	3		0	888	888	VITABIOTICS PRECONCEIVE		0	1	PHARMACIST	3	0	0	888	888			0	1	PHARMACIST	3	0	0	888	888			0	0	888	888	0
2020	3	2	1	0	0	0	0	0	0	0	0	888	999	0	0	1	888	888		0	4	4	OCCASIONAL MULTIVITAMINS		0	0	888	888	0	1	GENERAL KNOWLEDGE	8			0	0	888	888	0	0	888	888			0	0	888	888	0
2021	3	2	1	0	0	0	0	0	0	0	1	THIS IS BABY NO.6 SO NOT REQUIRED	6	1	1	1	888	888		0	888	888	NONE		0	0	888	888	0	0	888	888			0	0	888	888	0	0	888	888			0	0	888	888	0
2025	3	2	1	1	0	1	0	0	1	1	1	PRE TERM BIRTH	6	5	1	0	3	3		1	2	2	999		1	0	888	888	1	0	888	888			1	0	888	888	1	0	888	888			0	0	888	888	0
2026	3	2	1	1	0	0	0	0	1	0	0	888	999	2	1	0	3	3		1	2	2	999		0	0	888	888	0	0	888	888			0	0	888	888	0	0	888	888			0	0	888	888	0
2027	3	2	1	1	0	0	0	0	1	0	0	888	999	2	1	0	3	3		1	2	2	999		1	0	888	888	0	0	888	888			0	0	888	888	0	0	888	888			0	0	888	888	0
2028	3	2	1	0	0	0	0	0	0	0	0	888	999	0	0	1	888	888		0	888	888	NONE - IT IS WORTH NOTING FOR THE ABOVE QUESTIONS THAT THIS IS MY WIFE'S 5TH PREGNANCY SO WE HAD A LOT OF KNOWLEDGE FROM THE PREVIOUS ONES.		0	0	888	888	0	0	888	888			0	0	888	888	0	0	888	888			0	0	888	888	0
2034	3	2	1	0	0	0	0	0	0	0	0	888	999	0	0	1	888	888		0	888	888	NONE		0	0	888	888	0	0	888	888			0	0	888	888	0	0	888	888			0	0	888	888	0
2035	3	2	1	1	1	0	0	0	1	0	1	IVF CLINIC	5	4	1	0	3	3		0	888	888	NONE		0	0	888	888	1	0	888	888			0	0	888	888	1	0	888	888			0	0	888	888	0
2036	3	2	1	0	0	1	0	0	0	0	0	888	999	1	1	0	3	3		1	2	2	999		1	0	888	888	0	0	888	888			0	0	888	888	0	0	888	888			0	0	888	888	0
2038	3	2	1	1	0	0	0	1	1	0	0	888	999	3	1	0	3	3		1	4	4	NIL		0	1	SPECIALIST	9	0	0	888	888			0	1	SPECIALIST	9	0	0	888	888			0	0	888	888	0
2043	3	2	1	1	1	0	0	0	0	1	0	888	999	3	1	0	3	3		1	3	3	MULTI VITAMINS		1	0	888	888	0	0	888	888			1	0	888	888	1	0	888	888			0	0	888	888	0
2044	3	2	1	0	0	0	0	0	0	0	0	888	999	0	0	1	888	888		0	4	4	999		0	0	888	888	1	0	888	888			0	0	888	888	0	0	888	888			0	0	888	888	0
2052	3	2	1	1	1	0	1	0	0	0	0	888	999	3	1	0	2	2		0	888	888	MULTI VITAMIN & ZINC		0	0	888	888	0	0	888	888			0	0	888	888	0	0	888	888			0	0	888	888	0
2058	3	2	1	0	0	0	0	0	0	0	0	888	999	0	0	1	888	888		0	4	4	999		0	0	888	888	1	0	888	888			0	0	888	888	0	0	888	888			0	0	888	888	0
2059	3	2	1	0	0	0	0	0	0	0	0	888	999	0	0	1	888	888		0	2	2	MULTI VITAMINS. PROTEIN SHAKES		0	0	888	888	0	0	888	888			0	0	888	888	0	0	888	888			0	0	888	888	0
2060	3	2	1	0	0	0	0	0	0	0	0	888	999	0	0	1	888	888		0	888	888	N/A		0	0	888	888	0	0	888	888			0	0	888	888	0	0	888	888			0	0	888	888	0
2061	3	2	1	1	0	0	0	0	1	0	0	888	999	2	1	0	2	2		0	888	888	1 PER DAY BEROCCA SUPP.		0	0	888	888	1	0	888	888			0	0	888	888	0	0	888	888			0	0	888	888	0
2062	3	2	1	1	0	0	0	0	1	1	0	888	999	3	1	0	3	3		1	2	2	999		1	0	888	888	1	0	888	888			0	0	888	888	0	0	888	888			0	0	888	888	0
2063	3	2	1	1	1	1	1	0	1	0	0	888	999	5	1	0	2	2		0	888	888	FOLIC ACID		0	0	888	888	0	1	999	999			0	0	888	888	0	0	888	888			0	0	888	888	0
2064	3	2	1	0	0	0	0	0	0	0	0	888	999	0	0	1	888	888		0	4	4	999		0	0	888	888	0	0	888	888			0	0	888	888	0	0	888	888			0	0	888	888	0
2067	3	2	1	0	1	0	0	0	1	0	0	888	999	2	1	0	2	2		0	4	4	PROTEIN SHAKES		0	0	888	888	0	0	888	888			0	0	888	888	0	0	888	888			0	0	888	888	0
2068	3	2	1	999	999	999	999	999	999	999	999	888	999	999	999	999	999	999		999	999	999	999		0	0	888	888	0	0	888	888			0	0	888	888	0	0	888	888			0	0	888	888	0
2069	3	2	1	1	0	0	0	0	1	1	0	888	999	3	1	0	2	2		0	4	4	NONE		0	0	888	888	0	0	888	888			0	0	888	888	0	0	888	888			0	0	888	888	0
2070	3	2	1	0	1	0	0	0	1	0	0	888	999	2	1	0	3	3		0	4	4	999		0	0	888	888	1	0	888	888			0	0	888	888	0	0	888	888			0	0	888	888	0
2071	3	2	1	0	999	999	999	999	999	999	999	888	999	999	999	999	999	999		0	3	3	MULTI VITAMIN. VITAMIN C. VITAMIN B.		0	0	888	888	0	0	888	888			0	0	888	888	0	0	888	888			0	0	888	888	0
2072	3	2	1	0	0	0	1	0	0	0	0	888	999	1	1	0	2	2		0	888	888	N/A		0	0	888	888	0	0	888	888			0	0	888	888	0	0	888	888			0	0	888	888	0
2075	3	2	1	1	1	0	1	0	1	1	0	888	999	5	1	0	3	3		0	3	3	999		1	0	888	888	1	0	888	888			1	0	888	888	1	0	888	888			1	0	888	888	1
2079	3	2	1	0	0	0	0	1	1	0	0	888	999	2	1	0	3	3		0	888	888	NONE		0	0	888	888	0	1	999	999			0	0	888	888	0	1	999	999			0	0	888	888	0
2082	3	2	1	0	0	0	0	0	0	0	0	888	999	0	0	1	888	888		0	888	888	NONE - OCCASIONAL MULTI VITAMINS		0	0	888	888	1	0	888	888			0	0	888	888	1	0	888	888			0	0	888	888	0
2085	3	2	1	1	0	0	0	0	1	0	0	888	999	2	1	0	2	2		1	2	2	999		0	0	888	888	0	0	888	888			0	0	888	888	0	0	888	888			0	0	888	888	0
2086	3	2	1	0	0	0	0	0	0	1	0	888	999	1	1	0	2	2		0	888	888	999		0	0	888	888	0	0	888	888			0	0	888	888	0	0	888	888			0	0	888	888	0
2087	3	2	1	0	0	0	0	1	1	0	1	INFORMATION FROM PRIOR PREGNANCIES	6	3	1	0	2	2		0	888	888	NONE		0	0	888	888	0	0	888	888			0	0	888	888	0	0	888	888			0	0	888	888	0
2088	3	2	1	0	0	0	0	0	0	0	0	888	999	0	0	1	888	888		0	4	4	NONE		0	0	888	888	0	0	888	888			0	0	888	888	0	0	888	888			0	0	888	888	0
2090	3	2	1	0	0	0	0	0	0	0	0	888	999	0	0	1	888	888		0	4	4	999		1	0	888	888	0	0	888	888			0	0	888	888	0	0	888	888			0	0	888	888	0
2092	3	2	1	1	1	1	0	1	1	1	0	888	999	6	1	0	2	2		0	4	4	MULTI VITAMIN		0	0	888	888	1	0	888	888			0	0	888	888	0	0	888	888			0	0	888	888	0
2093	3	2	1	1	0	0	0	0	1	1	0	888	999	3	1	0	3	3		0	888	888	PROTEIN, CREATIN		0	0	888	888	0	0	888	888			0	0	888	888	0	0	888	888			0	0	888	888	0
2097	3	2	1	1	0	1	0	0	0	0	0	888	999	2	1	0	3	3		0	888	888	NONE		1	0	888	888	1	0	888	888			0	0	888	888	1	0	888	888			0	0	888	888	0
2099	3	2	1	1	0	0	0	0	0	0	0	888	999	1	1	1	888	888		0	4	4	N/A		0	0	888	888	0	0	888	888			0	0	888	888	0	0	888	888			0	0	888	888	0
2100	3	2	1	0	0	0	0	0	0	0	0	888	999	0	0	1	888	888		0	888	888	999		0	0	888	888	0	0	888	888			0	0	888	888	0	0	888	888			0	0	888	888	0
2101	3	2	1	0	0	0	0	0	0	0	0	888	999	0	0	1	888	888		0	888	888	NONE		0	0	888	888	0	0	888	888			0	0	888	888	0	0	888	888			0	0	888	888	0
2102	3	2	1	0	0	0	1	0	0	1	0	888	999	2	1	0	3	3		0	4	4	N/A		1	0	888	888	1	0	888	888			1	0	888	888	1	0	888	888			0	0	888	888	0
2103	3	2	1	1	0	0	0	0	1	0	0	888	999	2	1	0	3	3		1	3	3	999		0	0	888	888	0	0	888	888			0	0	888	888	0	0	888	888			0	0	888	888	0
2107	3	2	1	0	0	0	0	0	0	0	0	888	999	0	0	1	888	888		0	888	888	NONE		0	0	888	888	0	0	888	888			0	0	888	888	0	0	888	888			0	0	888	888	0
2110	3	2	1	1	0	0	0	0	1	1	0	888	999	3	1	0	3	3		1	3	3	999		0	0	888	888	1	0	888	888			0	0	888	888	0	0	888	888			0	0	888	888	0
2111	3	2	1	1	0	0	0	0	1	1	0	888	999	3	1	0	3	3		0	888	888	WHEY PROTEIN (PARMA). CELLMASS. NO XPLODE		1	0	888	888	0	0	888	888			0	0	888	888	0	0	888	888			0	0	888	888	0
2112	3	2	1	0	999	999	999	999	999	999	999	888	999	999	999	999	999	999		0	888	888	NONE		0	0	888	888	1	0	888	888			0	0	888	888	0	0	888	888			0	0	888	888	0
2114	3	2	1	1	0	0	0	0	1	0	0	888	999	2	1	0	2	2		0	4	4	*UNCLEAR* CONCEPTION (MEN)		0	0	888	888	0	1	SELF	1			0	0	888	888	0	1	SELF	1			0	0	888	888	0
2115	3	2	1	1	0	0	1	0	0	0	0	888	999	2	1	0	3	3		0	888	888	NONE		0	0	888	888	0	0	888	888			0	0	888	888	0	0	888	888			0	0	888	888	0
2117	3	2	1	1	1	0	0	1	1	0	0	888	999	4	1	0	3	3		1	2	2	PREGNANT CARE		1	0	888	888	0	0	888	888			1	0	888	888	0	0	888	888			0	0	888	888	0
2118	3	2	1	0	0	1	1	0	0	1	0	888	999	3	1	0	2	2		0	888	888	NONE		0	0	888	888	0	0	888	888			0	0	888	888	0	0	888	888			0	0	888	888	0
2119	3	2	1	1	0	0	0	1	1	1	0	888	999	4	1	0	3	3		1	3	3	IRON, VITAMINS		1	0	888	888	0	0	888	888			1	0	888	888	0	0	888	888			0	0	888	888	0
2120	3	2	1	0	0	0	0	0	0	0	0	NIL	888	0	0	1	888	888		0	4	4	NONE		0	0	888	888	0	0	888	888			0	0	888	888	0	0	888	888			0	0	888	888	0
2121	3	2	1	1	0	0	1	1	1	1	0	888	999	5	1	0	3	3		1	2	2	999		0	0	888	888	0	0	888	888			0	0	888	888	0	0	888	888			0	0	888	888	0
2124	3	2	1	1	1	1	1	0	1	1	0	888	999	6	1	0	3	3		0	888	888	999		0	0	888	888	0	0	888	888			0	0	888	888	0	0	888	888			0	0	888	888	0
2125	3	2	1	0	0	0	0	0	1	0	0	888	999	1	1	0	2	2		0	888	888	NONE		0	0	888	888	0	0	888	888			0	0	888	888	0	0	888	888			0	0	888	888	0
2127	3	2	1	0	0	0	0	0	0	0	0	888	999	0	0	1	888	888		0	888	888	N/A		0	0	888	888	1	0	888	888			0	0	888	888	0	0	888	888			0	0	888	888	0
2129	3	2	1	1	0	0	0	1	0	0	0	888	999	2	1	0	3	3		0	4	4	NO		0	0	888	888	1	0	888	888			0	0	888	888	1	0	888	888			0	0	888	888	1
2130	3	2	1	0	0	0	1	0	0	0	0	888	999	1	1	0	2	2		1	3	3	NONE		0	0	888	888	1	0	888	888			0	0	888	888	0	0	888	888			0	0	888	888	0
2132	3	2	1	1	0	1	1	0	0	0	0	888	999	3	1	0	3	3		0	2	2	999		0	0	888	888	0	0	888	888			1	0	888	888	0	0	888	888			0	0	888	888	0
2133	3	2	1	1	1	0	0	1	1	1	1	ONLINE PEER-REVIEW ARTICLES	11	6	1	0	2	2		0	888	888	NONE		0	0	888	888	1	0	888	888			0	0	888	888	0	0	888	888			0	0	888	888	0
2136	3	2	1	0	0	1	0	1	1	1	1	THIS IS OUR 3RD BABY, SO A BIT OF A VET	6	5	1	0	3	3		0	888	888	NONE		0	0	888	888	0	0	888	888			0	0	888	888	0	0	888	888			0	0	888	888	0
2137	3	2	1	1	1	1	1	1	1	0	0	888	999	6	1	0	3	3		1	2	2	999		0	0	888	888	0	0	888	888			0	0	888	888	0	0	888	888			0	0	888	888	0
2138	3	2	1	0	0	0	0	0	0	0	0	888	999	0	0	1	888	888		0	888	888	NONE		0	0	888	888	0	1	ALREADY KNEW	8			0	0	888	888	0	0	888	888			0	0	888	888	0
2139	3	2	1	0	1	0	0	0	0	1	0	888	999	2	1	0	999	999		0	888	888	999		0	0	888	888	0	0	888	888			0	0	888	888	0	0	888	888			0	0	888	888	0
2140	3	2	1	0	0	0	0	0	0	0	0	888	999	0	0	1	888	888		0	888	888	PROTEIN (BODY BUILDING SUPPLEMENTS)		0	0	888	888	0	0	888	888			0	0	888	888	0	0	888	888			0	0	888	888	0
2141	3	2	1	1	1	0	0	0	0	0	0	888	999	2	1	0	3	3		0	888	888	WELLMAN		0	0	888	888	0	0	888	888			0	0	888	888	0	0	888	888			0	0	888	888	0
2142	3	2	1	1	1	0	0	0	1	1	0	888	999	4	1	0	3	3		0	888	888	999		0	0	888	888	0	0	888	888			0	0	888	888	0	0	888	888			0	0	888	888	0
2143	3	2	1	1	0	0	0	0	0	1	0	888	999	2	1	0	3	3		0	4	4	999		0	0	888	888	0	0	888	888			0	0	888	888	0	0	888	888			0	0	888	888	0
2144	3	2	1	1	0	0	0	1	1	1	0	888	999	4	1	0	3	3		1	3	3	999		1	0	888	888	0	0	888	888			0	0	888	888	0	0	888	888			0	0	888	888	0
2146	3	2	1	0	0	0	0	0	0	0	0	888	999	0	0	1	3	3		1	3	3	CENTRUM, COD LIVER OIL		0	0	888	888	0	0	888	888			0	0	888	888	0	0	888	888			0	0	888	888	0
2147	3	2	1	1	0	0	0	1	0	0	0	888	999	2	1	0	3	3		1	3	3	WELLMAN CONCEPTION		1	0	888	888	1	0	888	888			1	0	888	888	1	0	888	888			0	0	888	888	0
2148	3	2	1	0	0	0	0	0	0	0	0	888	999	0	0	1	888	888		0	888	888	THE ODD VITAMIN C TABLET (RARELY)		0	0	888	888	0	0	888	888			0	0	888	888	0	0	888	888			0	0	888	888	0
2149	3	2	1	1	0	1	1	0	1	1	0	888	999	5	1	0	2	2		1	2	2	N/A		1	0	888	888	0	0	888	888			0	0	888	888	1	0	888	888			0	0	888	888	1
2150	3	2	1	0	0	0	0	0	1	0	0	888	999	1	1	0	3	3		1	1	1	FISH OIL, HOLLAND AND BARRETT VITAMINS		0	0	888	888	0	0	888	888			0	0	888	888	0	0	888	888			0	0	888	888	0
2151	3	2	1	1	0	0	1	0	0	1	0	888	999	3	1	0	3	3		1	2	2	999		1	0	888	888	0	0	888	888			0	0	888	888	0	0	888	888			0	0	888	888	0
2153	3	2	1	1	1	0	0	1	1	0	0	888	999	4	1	0	3	3		1	3	3	NONE		0	0	888	888	0	0	888	888			0	0	888	888	0	0	888	888			0	0	888	888	0
2155	3	2	1	0	0	1	0	0	0	1	0	888	999	2	1	0	2	2		0	4	4	999		0	0	888	888	1	0	888	888			0	0	888	888	1	0	888	888			0	0	888	888	0
2157	3	2	1	1	0	0	0	0	1	0	0	888	999	2	1	0	3	3		0	888	888	999		0	0	888	888	0	0	888	888			0	0	888	888	0	0	888	888			0	0	888	888	0
2159	3	2	1	0	0	0	0	0	1	0	0	888	999	1	1	0	3	3		0	4	4	999		0	0	888	888	0	0	888	888			0	0	888	888	0	0	888	888			0	0	888	888	0
2160	3	2	1	0	1	1	0	1	1	0	0	888	999	4	1	0	2	2		0	2	2	WELLMAN MULTI VITAMINS. FISH OIL TABLETS / CAPSULES.		0	0	888	888	0	0	888	888			0	0	888	888	0	0	888	888			0	0	888	888	0
2161	3	2	1	0	0	1	1	0	0	0	0	888	999	2	1	0	3	3		0	888	888	999		0	0	888	888	1	0	888	888			0	0	888	888	0	0	888	888			0	0	888	888	0
2166	3	2	1	0	0	0	0	0	0	0	0	888	999	0	0	1	2	2		0	3	3	COENLYME, IRON		0	0	888	888	1	0	888	888			0	0	888	888	0	0	888	888			0	0	888	888	0
2167	3	2	1	0	0	0	0	0	0	0	0	888	999	0	0	1	888	888		0	888	888	DIET PROTEIN + MULTIVITAMIN. SHE WAS NOT TAKING ANYTHING.		0	0	888	888	0	0	888	888			0	0	888	888	0	0	888	888			0	0	888	888	0
2168	3	2	1	1	0	1	0	0	1	1	0	888	999	4	1	0	3	3		1	3	3	PREGNACARE ACIDO		1	0	888	888	1	0	888	888			1	0	888	888	0	0	888	888			0	0	888	888	0
2170	3	2	1	0	0	1	0	0	0	1	0	888	999	2	1	0	3	3		0	4	4	999		0	0	888	888	1	0	888	888			0	0	888	888	1	0	888	888			0	0	888	888	0
2171	3	2	1	0	1	1	1	1	1	1	0	888	999	6	1	0	2	2		0	4	4	NONE		0	1	MIDWIFE	1	1	1	INTERNET	3			0	1	MIDWIFE	1	1	1	INTERNET	3			0	0	888	888	0
2172	3	2	1	0	0	1	1	0	0	0	0	888	999	2	1	0	2	2		0	4	4	N/A		0	0	888	888	0	0	888	888			0	0	888	888	0	0	888	888			0	0	888	888	0
2173	3	2	1	0	0	0	0	0	0	1	0	888	999	1	1	0	2	2		0	888	888	NONE		0	0	888	888	0	0	888	888			0	0	888	888	0	0	888	888			0	0	888	888	0
2174	3	2	1	0	0	0	0	1	0	1	0	888	999	2	1	0	2	2		0	888	888	NONE		0	0	888	888	0	0	888	888			0	0	888	888	0	0	888	888			0	0	888	888	0
2176	3	2	1	1	0	0	0	0	1	1	0	888	999	3	1	0	2	2		0	888	888	NONE		1	0	888	888	1	0	888	888			0	0	888	888	1	0	888	888			0	0	888	888	1
2177	3	2	1	0	0	1	1	0	0	0	0	888	999	2	1	0	2	2		0	888	888	999		0	0	888	888	0	1	ALREADY KNOW	8			0	0	888	888	0	0	888	888			0	0	888	888	0
2178	3	2	1	1	1	0	0	0	1	1	0	888	999	4	1	0	3	3		0	888	888	NONE		0	0	888	888	0	1	SELF	1			0	0	888	888	0	0	888	888			0	0	888	888	0
2184	3	2	1	1	0	1	0	0	1	1	0	888	999	4	1	0	3	3		0	888	888	VT C & ZINC		1	0	888	888	1	0	888	888			1	0	888	888	0	0	888	888			0	0	888	888	0
2185	3	2	1	1	0	0	0	0	1	1	0	888	999	3	1	0	3	3		0	888	888	PREGNACARE FOR MEN. BEROCCA		0	0	888	888	0	0	888	888			0	0	888	888	0	0	888	888			0	0	888	888	0
2186	3	2	1	0	0	0	0	0	0	0	0	888	999	0	0	1	888	888		0	4	4	PROTEIN SHAKES		0	0	888	888	1	0	888	888			0	0	888	888	1	0	888	888			0	0	888	888	0
2189	3	2	1	1	0	1	0	1	0	1	0	888	999	4	1	0	2	2		1	2	2	999		1	0	888	888	1	0	888	888			0	0	888	888	0	0	888	888			0	0	888	888	0
2190	3	2	1	0	0	0	0	0	1	1	0	888	999	2	1	0	2	2		0	888	888	OMEGA 3, MULTI VITAMIN		0	0	888	888	0	0	888	888			0	0	888	888	0	0	888	888			0	0	888	888	0
2191	3	2	1	1	0	0	1	1	1	0	0	888	999	4	1	0	3	3		0	888	888	PREGNACARE PRE-CONCEPTION		1	0	888	888	0	0	888	888			0	0	888	888	0	0	888	888			0	0	888	888	0
2195	3	2	1	1	0	0	0	0	1	0	0	888	999	2	1	0	3	3		1	4	4	WHEY PROTEIN		0	0	888	888	1	0	888	888			0	0	888	888	0	0	888	888			0	0	888	888	0
2196	3	2	1	0	0	0	0	0	0	0	0	888	999	0	0	1	888	888		0	4	4	999		0	0	888	888	0	0	888	888			0	0	888	888	0	0	888	888			0	0	888	888	0
2197	3	2	1	1	1	0	0	0	0	0	0	888	999	2	1	0	2	2		0	888	888	999		0	0	888	888	0	0	888	888			0	0	888	888	0	0	888	888			0	0	888	888	0
2198	3	2	1	1	1	0	0	1	0	1	0	888	999	4	1	0	1	1		1	1	1	999		0	1	999	999	0	0	888	888			0	0	888	888	0	0	888	888			0	0	888	888	0
2199	3	2	1	0	0	0	0	0	0	0	0	888	999	0	0	1	888	888		0	888	888	NONE		0	0	888	888	0	0	888	888			0	0	888	888	0	0	888	888			0	0	888	888	0
2204	3	2	1	1	0	0	0	1	0	0	0	888	999	2	1	0	3	3		1	3	3	NONE		0	0	888	888	0	0	888	888			0	0	888	888	0	0	888	888			0	0	888	888	0
2208	3	2	1	1	0	0	0	0	1	1	0	888	999	3	1	0	3	3		0	888	888	MULTIVITAMINS		0	0	888	888	0	0	888	888			0	0	888	888	0	0	888	888			0	0	888	888	0
2209	3	2	1	1	0	1	0	0	1	0	0	888	999	3	1	0	3	3		0	888	888	999		0	0	888	888	1	0	888	888			0	0	888	888	1	0	888	888			0	0	888	888	0
2213	3	2	1	1	0	1	0	0	1	1	0	888	999	4	1	0	3	3		0	888	888	NONE		0	0	888	888	1	0	888	888			0	0	888	888	1	0	888	888			0	0	888	888	0
2214	3	2	1	0	0	0	0	0	0	1	0	888	999	1	1	0	2	2		0	888	888	FOLIC ACID		0	0	888	888	0	0	888	888			0	0	888	888	0	0	888	888			0	0	888	888	0
2215	3	2	1	1	1	0	0	0	1	1	0	888	999	4	1	0	2	2		0	4	4	NONE		0	0	888	888	1	0	888	888			0	0	888	888	1	0	888	888			0	0	888	888	0
2219	3	2	1	1	0	0	0	0	0	1	0	888	999	2	1	0	2	2		0	888	888	NONE		0	0	888	888	0	1	999	999			0	0	888	888	0	1	999	999			0	1	999	999	0
2221	3	2	1	0	0	0	0	0	0	0	0	888	999	0	0	1	888	888		0	888	888	THERE WERE NONE TAKEN OF VITAMINS NOR SUPPLEMENTS INTAKE.		0	0	888	888	0	0	888	888			0	0	888	888	0	0	888	888			0	0	888	888	0
2222	3	2	1	1	0	0	0	0	1	0	0	888	999	2	1	0	2	2		0	888	888	NONE		0	0	888	888	0	0	888	888			0	0	888	888	0	0	888	888			0	0	888	888	0
2223	3	2	1	1	0	0	0	1	1	1	0	888	999	4	1	0	3	3		1	3	3	NONE		0	0	888	888	0	0	888	888			0	0	888	888	0	0	888	888			0	0	888	888	0
2225	3	2	1	1	0	0	0	1	1	1	0	888	999	4	1	0	3	3		1	3	3	I AM TAKING MULTIVITAMIN TABLETS FOR GENERAL HEALTH.		1	0	888	888	0	0	888	888			1	0	888	888	0	0	888	888			0	0	888	888	0
2226	3	2	1	0	0	0	0	0	0	0	0	888	999	0	0	1	888	888		0	4	4	NONE		0	0	888	888	0	0	888	888			0	0	888	888	0	0	888	888			0	0	888	888	0
2229	3	2	1	0	0	0	0	0	0	0	0	888	999	0	0	1	888	888		0	4	4	NONE		0	0	888	888	0	0	888	888			0	0	888	888	0	0	888	888			0	0	888	888	0
2231	3	2	1	1	0	0	0	0	1	0	0	WEB	888	2	1	0	2	2		0	4	4	PROTEIN SHAKE		0	0	888	888	0	0	888	888			0	0	888	888	0	0	888	888			0	0	888	888	0
2242	3	2	1	0	0	0	0	0	0	0	0	888	999	0	0	1	888	888		0	888	888	N/A		0	0	888	888	0	0	888	888			0	0	888	888	0	0	888	888			0	0	888	888	0
2250	3	2	1	0	0	0	0	0	0	0	0	888	999	0	0	1	888	888		0	888	888	NONE		0	0	888	888	0	0	888	888			0	0	888	888	0	0	888	888			0	0	888	888	0
2261	3	2	1	1	0	0	1	1	0	1	0	888	999	4	1	0	2	2		0	888	888	N/A		0	0	888	888	0	0	888	888			0	0	888	888	0	0	888	888			0	0	888	888	0
2268	3	2	1	0	0	0	0	0	1	1	0	888	999	2	1	0	3	3		0	888	888	999		1	0	888	888	1	1	INTERNET	3			0	0	888	888	1	1	ADVERTISEMENTS	5			0	0	888	888	0
2271	3	2	1	1	0	0	0	0	1	0	0	888	999	2	1	0	2	2		0	4	4	NONE		0	0	888	888	0	0	888	888			0	0	888	888	0	0	888	888			0	0	888	888	0
2273	3	2	1	1	0	1	0	0	1	1	0	888	999	4	1	0	2	2		0	888	888	NONE		0	1	GYNAECOLOGIST	9	0	1	GENERAL READING	4			0	1	GYNAECOLOGIST	9	0	1	GENERAL READING	4			0	0	888	888	0
2277	3	2	1	1	0	0	0	0	1	0	0	888	999	2	1	0	3	3		0	888	888	ZINC, CALCIUM, VITAMIN C AND VITAMIN B COMPLEX		1	0	888	888	1	0	888	888			0	0	888	888	0	0	888	888			0	0	888	888	0
2278	3	2	1	1	0	0	0	0	1	0	0	888	999	2	1	0	2	2		0	888	888	COD LIVER OIL. GARLIC (NON ODOURLESS). VITAMIN C		0	0	888	888	1	0	888	888			0	0	888	888	0	1	SELF / PARTNER	1			0	0	888	888	0
2282	3	2	1	0	0	0	0	0	0	1	0	888	999	1	1	0	2	2		0	888	888	N/A		0	0	888	888	0	0	888	888			0	0	888	888	0	0	888	888			0	0	888	888	0
2285	3	2	1	0	0	0	1	1	0	0	0	888	999	2	1	0	999	999		0	888	888	999		0	0	888	888	0	0	888	888			0	0	888	888	0	0	888	888			0	0	888	888	0
2287	3	2	1	0	0	0	0	0	0	0	0	888	999	0	0	1	888	888		0	888	888	NONE		0	0	888	888	0	0	888	888			0	0	888	888	0	0	888	888			0	0	888	888	0
2291	3	2	1	0	0	0	0	0	1	1	0	888	999	2	1	0	3	3		0	4	4	NONE		1	0	888	888	1	0	888	888			1	0	888	888	1	0	888	888			1	0	888	888	1
2299	3	2	1	0	0	0	0	0	0	0	0	888	999	0	0	1	888	888		0	4	4	NONE		0	0	888	888	0	0	888	888			0	0	888	888	0	0	888	888			0	0	888	888	0
2300	3	2	1	0	0	0	0	0	0	0	0	888	999	0	0	1	888	888		0	4	4	PROPECIA		0	0	888	888	0	0	888	888			0	0	888	888	0	0	888	888			0	0	888	888	0
2302	3	2	1	0	0	0	0	0	0	0	0	888	999	0	0	1	888	888		0	888	888	OMEGA?. PREGNACARE CONCEPTION FOR HIM		0	0	888	888	0	0	888	888			0	0	888	888	0	1	PARTNER	9			0	0	888	888	0
2304	3	2	1	0	0	0	0	0	1	0	0	888	999	1	1	0	2	2		1	2	2	999		1	0	888	888	0	0	888	888			0	0	888	888	0	0	888	888			0	0	888	888	0
2305	3	2	1	0	0	0	0	0	0	0	0	888	999	0	0	1	888	888		0	888	888	NONE		0	0	888	888	0	0	888	888			0	0	888	888	0	0	888	888			0	0	888	888	0
2307	3	2	1	0	0	0	0	1	0	0	0	888	999	1	1	0	2	2		1	2	2	999		1	1	999	999	0	0	888	888			0	0	888	888	0	0	888	888			0	0	888	888	0
2346	3	2	1	0	1	0	0	0	1	1	0	888	999	3	1	0	2	2		0	888	888	NONE		0	0	888	888	0	0	888	888			0	0	888	888	0	0	888	888			0	0	888	888	0
2347	3	2	1	0	0	0	0	0	0	1	0	888	999	1	1	0	3	3		0	4	4	N/A		0	0	888	888	0	0	888	888			0	0	888	888	0	0	888	888			0	0	888	888	0
2348	3	2	1	0	0	0	0	0	0	0	0	888	999	0	0	1	888	888		0	888	888	999		0	0	888	888	0	0	888	888			0	0	888	888	0	0	888	888			0	0	888	888	0
2351	3	2	1	1	0	0	0	0	1	1	0	888	999	3	1	0	1	1		0	666	666	NONE		0	0	888	888	0	0	888	888			0	0	888	888	0	0	888	888			0	0	888	888	1
2359	3	2	1	0	1	1	0	0	1	0	0	888	999	3	1	0	3	3		1	3	3	NONE		0	0	888	888	0	0	888	888			0	0	888	888	0	0	888	888			0	0	888	888	0
2361	3	2	1	1	0	0	0	0	1	0	0	888	999	2	1	0	3	3		1	3	3	MAXAZOL		1	0	FAMILY DOC	888	0	0	888	888			0	0	888	888	0	0	888	888			0	0	888	888	0
2369	3	2	1	0	999	999	999	999	999	999	999	888	999	999	999	999	999	999		0	888	888	NONE		0	0	888	888	0	0	888	888			0	0	888	888	0	0	888	888			0	0	888	888	0
2372	3	2	1	1	1	0	0	1	0	1	0	888	999	4	1	0	3	3		1	3	3	FOLIC ACID		1	0	888	888	0	0	888	888			0	0	888	888	0	0	888	888			0	0	888	888	0
2377	3	2	1	1	0	0	1	0	1	0	0	888	999	3	1	0	3	3		1	2	2	999		1	1	PRIVATE	8	0	0	888	888			0	0	888	888	0	0	888	888			0	0	888	888	0
2380	3	2	1	0	0	0	0	1	1	1	0	888	999	3	1	0	3	3		0	888	888	NONE		0	0	888	888	0	0	888	888			0	0	888	888	0	0	888	888			0	0	888	888	0
2385	3	2	1	0	0	0	0	0	0	0	0	888	999	0	0	1	888	888		0	4	4	999		0	0	888	888	0	0	888	888			0	0	888	888	0	0	888	888			0	0	888	888	0
2388	3	2	1	1	0	0	0	0	1	0	1	FERTILITY CLINIC	5	3	1	0	3	3		1	999	999	NONE		0	0	888	888	0	0	888	888			0	0	888	888	0	0	888	888			0	0	888	888	0
2434	3	2	1	0	0	0	0	0	0	0	0	888	999	0	0	1	888	888		0	888	888	N/A		0	0	888	888	1	0	888	888			0	0	888	888	1	0	888	888			0	0	888	888	1
2435	3	2	1	0	0	0	0	0	0	1	0	888	999	1	1	0	1	1		0	888	888	999		0	0	888	888	0	0	888	888			0	0	888	888	0	0	888	888			0	0	888	888	0
2436	3	2	1	0	0	0	0	0	0	0	0	888	999	0	0	1	888	888		0	888	888	999		0	0	888	888	0	0	888	888			0	0	888	888	0	0	888	888			0	0	888	888	0
2437	3	2	1	0	0	0	0	0	0	1	0	888	999	1	1	0	3	3		1	2	2	FOLIC ACID		0	1	999	999	0	0	888	888			0	1	999	999	0	0	888	888			0	0	888	888	0
2438	3	2	1	0	0	0	0	0	0	0	0	888	999	0	0	1	888	888		1	3	3	MUTLIVITAMIN + IRON		0	0	888	888	0	0	888	888			0	0	888	888	0	0	888	888			0	0	888	888	0
2444	3	2	1	0	0	0	0	0	0	0	0	888	999	0	0	1	888	888		0	888	888	BODY BUILDING SUPPLEMENTS (PROTEIN SHAKES)		0	0	888	888	0	0	888	888			0	0	888	888	0	0	888	888			0	0	888	888	0
2446	3	2	1	1	0	0	1	0	1	0	0	888	999	3	1	0	3	3		0	888	888	NONE		0	0	888	888	0	0	888	888			0	0	888	888	0	0	888	888			0	0	888	888	0
2448	3	2	1	1	0	0	0	0	1	1	0	888	999	3	1	0	2	2		0	888	888	NONE		0	0	888	888	0	0	888	888			0	0	888	888	0	0	888	888			0	0	888	888	0
2450	3	2	1	1	0	0	0	0	1	1	0	888	999	3	1	0	3	3		0	888	888	MULTIVITAMIN. OMEGA OILS / COD LIVER OILS		1	0	888	888	1	0	888	888			0	0	888	888	1	0	888	888			0	0	888	888	0
2451	3	2	1	0	0	0	1	0	0	1	0	888	999	2	1	0	2	2		0	888	888	NONE		0	0	888	888	1	0	888	888			0	0	888	888	1	0	888	888			0	0	888	888	1
2454	3	2	1	0	0	0	0	0	1	0	0	888	999	1	1	0	2	2		0	888	888	NONE		0	0	888	888	0	0	888	888			0	0	888	888	0	0	888	888			0	0	888	888	0
2463	3	2	1	0	0	0	0	0	0	0	1	TV	8	1	1	1	888	888		0	888	888	NONE		0	0	888	888	0	0	888	888			0	0	888	888	0	0	888	888			0	0	888	888	0
2467	3	2	1	1	0	0	0	0	0	0	1	AS THIS IS OUR 2ND PREGNANCY, WE'D READ LOTS FIRST TIME AROUND.	6	2	1	0	3	3		0	888	888	JUST STANDARD MULTIVITAMINS & MINERALS THAT I'VE TAKEN FOR YEARS.		0	1	PROBABLY COVERED FROM 1ST PREGNANCY.	2	0	1	MY WIFE TOLD ME ABOUT THIS.	9			0	1	PROBABLY COVERED FROM 1ST PREGANCY	2	1	0	888	888			0	1	PROBABLY COVERED FROM 1ST PREGNANCY.	2	1
2468	3	2	1	1	0	0	0	0	1	0	0	888	999	2	1	0	2	2		1	2	2	999		0	0	888	888	0	0	888	888			0	0	888	888	0	0	888	888			0	0	888	888	0
2472	3	2	1	0	0	0	0	0	0	0	0	888	999	0	0	1	888	888		0	888	888	999		0	0	888	888	0	0	888	888			0	0	888	888	0	0	888	888			0	0	888	888	0
2481	3	2	1	0	0	0	1	0	0	0	0	888	999	1	1	0	2	2		0	888	888	NONE		0	0	888	888	0	0	888	888			0	0	888	888	0	0	888	888			0	0	888	888	0
2482	3	2	1	0	0	0	0	0	0	1	0	888	999	1	1	0	3	3		0	888	888	N/A		0	0	888	888	0	0	888	888			0	0	888	888	0	0	888	888			0	0	888	888	0
2488	3	2	1	1	0	0	0	1	0	1	0	888	999	3	1	0	1	1		1	1	1	999		0	0	888	888	0	0	888	888			1	0	888	888	0	0	888	888			0	0	888	888	0
2491	3	2	1	0	0	0	0	0	0	0	0	888	999	0	0	1	888	888		0	888	888	999		0	0	888	888	0	0	888	888			0	0	888	888	0	0	888	888			0	0	888	888	0
2493	3	2	1	0	0	0	0	0	0	0	1	I'M A DOCTOR - MEDICAL SCHOOL	3	1	1	0	999	999		0	4	4	VIT D. FISH OIL. VIT C		0	0	888	888	0	1	UNIVERSITY	7			0	1	MY NEUROLOGIST TO LOWER RISK OF MS	4	0	0	888	888			0	0	888	888	0
2496	3	2	1	0	0	0	0	0	1	0	0	888	999	1	1	0	3	3		1	2	2	999		0	0	888	888	0	0	888	888			0	0	888	888	0	0	888	888			0	0	888	888	0
2497	3	2	1	1	1	0	1	1	0	1	0	888	999	5	1	0	3	3		1	3	3	999		1	0	888	888	0	0	888	888			0	0	888	888	0	0	888	888			0	0	888	888	0
2498	3	2	1	0	999	999	999	999	999	999	999	888	999	999	999	999	999	999		0	888	888	IRON		0	0	888	888	0	0	888	888			0	0	888	888	0	0	888	888			0	0	888	888	0
2503	3	2	1	1	0	0	0	1	0	1	0	888	999	3	1	0	3	3		1	3	3	999		0	0	888	888	0	0	888	888			0	0	888	888	0	0	888	888			0	0	888	888	0
2505	3	2	1	1	0	0	0	0	1	1	0	888	999	3	1	0	3	3		1	1	1	FOLIC ACID. VITAMIN D		1	0	888	888	0	0	888	888			1	0	888	888	0	0	888	888			0	0	888	888	0
2506	3	2	1	0	0	0	0	0	0	0	0	888	999	0	0	1	888	888		0	4	4	NONE		0	0	888	888	0	0	888	888			0	0	888	888	0	0	888	888			0	0	888	888	0
2508	3	2	1	0	0	0	0	0	0	1	0	888	999	1	1	0	3	3		0	4	4	NONE		0	0	888	888	0	0	888	888			0	0	888	888	0	0	888	888			0	0	888	888	0
2512	3	2	1	0	0	0	0	0	0	0	0	888	999	0	0	1	888	888		0	888	888	NONE		0	0	888	888	0	0	888	888			0	0	888	888	0	0	888	888			0	0	888	888	0
[truncated: 294 more columns]
